# Supplementary material for: Porous Functionalized Polymers enable Generating and Transporting Hyperpolarized Arbitrary Solutions.
Source: Research Square preprint supplement (doi:10.21203/rs.3.rs-123790/v1), 2021-01-14
Supplement: Supplementary file 1 [file 15f6b90fec3a4a27236fa5f8.pdf]

# Porous Functionalized Polymers enable Generating and Transporting Hyperpolarized Arbitrary Solutions.

*Théo El Daraï,<sup>1,2</sup> Samuel F. Cousin,<sup>\*1</sup> Quentin Chappuis,<sup>1</sup> Morgan Ceillier,<sup>1</sup> James G. Kempf,<sup>5</sup> Dmitry Eshchenko,<sup>3</sup> Roberto Melzi,<sup>6</sup> Marc Schnell,<sup>3</sup> Laurent Gremillard,<sup>4</sup> Aurélien Bornet,<sup>1</sup> Jonas Milani,<sup>1</sup> Basile Vuichoud,<sup>1</sup> Olivier Cala,<sup>1</sup> Damien Montarnal,<sup>\*2</sup> and Sami Jannin<sup>1</sup>*

<sup>1</sup> Univ. Lyon, Centre de RMN à Très Hauts Champs de Lyon, FRE2034 - CNRS/UCBL/ENS de Lyon, 5 rue de la Doua, 69100 Villeurbanne, France.

<sup>2</sup> Univ Lyon, CPE Lyon, CNRS, Catalyse, Chimie, Polymères et Procédés, UMR 5265, F-69003, Lyon, France

<sup>3</sup> Bruker Biospin, 8117 Fallanden, Switzerland

<sup>4</sup> Univ Lyon, INSA Lyon, MATEIS UMR CNRS 5510, Bât. Blaise Pascal, 7 Avenue Jean Capelle, Villeurbanne, France

<sup>5</sup> Bruker Biospin, 15 Fortune Dr., Billerica, Massachusetts 01821, United States

<sup>6</sup> Bruker Italia Srl, 20158 Milano, Italy

## Table des matières

|       |                                                                 |    |
|-------|-----------------------------------------------------------------|----|
| 1     | Materials & Methods .....                                       | 3  |
| 1.1   | Materials .....                                                 | 3  |
| 1.2   | SEM characterization.....                                       | 3  |
| 1.3   | Characterization of porosity .....                              | 3  |
| 1.3.1 | Mercury intrusion porosimetry .....                             | 3  |
| 1.3.2 | Nitrogen physisorption.....                                     | 3  |
| 1.4   | Rheology .....                                                  | 3  |
| 1.5   | EPR .....                                                       | 3  |
| 2     | HYPOP-I Synthesis, Preparation & Analysis.....                  | 4  |
| 2.1   | HYPOPs Synthesis and Preparation.....                           | 4  |
| 2.2   | HYPOP-I composition.....                                        | 4  |
| 2.3   | SEM analyses of porous samples with varying compositions .....  | 5  |
| 2.4   | SEM analyses of HYPOP-I samples .....                           | 7  |
| 2.5   | Monitoring of the curing by rheology .....                      | 10 |
| 2.6   | Mercury Intrusion Porosimetry .....                             | 10 |
| 2.7   | Nitrogen physisorption.....                                     | 12 |
| 3     | Quantification of Radical Concentration in HYPOP-I by EPR ..... | 12 |
| 3.1   | Method .....                                                    | 12 |
| 3.2   | Calibration.....                                                | 13 |
| 3.3   | EPR spectra and quantification of radicals .....                | 14 |
| 4     | NMR pulses sequences .....                                      | 14 |
| 4.1   | Thermal equilibrium & DNP buildup .....                         | 14 |
| 4.2   | Cross-polarization .....                                        | 15 |
| 5     | Impregnation with a given solvent.....                          | 15 |

|     |                                                                                                                                                                  |    |
|-----|------------------------------------------------------------------------------------------------------------------------------------------------------------------|----|
| 5.1 | Methods of impregnation .....                                                                                                                                    | 15 |
| 5.2 | Swelling measurements.....                                                                                                                                       | 15 |
| 6   | Filtration system.....                                                                                                                                           | 17 |
| 7   | Microwaves optimization at 1.2K and 7.05 T, on HYPOP- <b>I</b> :.....                                                                                            | 17 |
| 8   | Polarization quantification .....                                                                                                                                | 18 |
| 8.1 | Method for polarization quantification in solid state .....                                                                                                      | 18 |
| 8.2 | Dry HYPOP <sup>1</sup> H DNP build-ups .....                                                                                                                     | 19 |
| 8.3 | Impregnated (10% <sub>v</sub> H <sub>2</sub> O / 10% <sub>v</sub> ETOD <sub>6</sub> / 80% <sub>v</sub> H <sub>2</sub> O) HYPOP <sup>1</sup> H DNP build-ups..... | 24 |
| 8.4 | <sup>13</sup> C relaxation measurement .....                                                                                                                     | 28 |
| 8.5 | Calculation of enhancements after dissolution .....                                                                                                              | 29 |
| 9   | Bibliography .....                                                                                                                                               | 30 |

# 1 Materials & Methods

## 1.1 Materials

(2,2,6,6-Tetramethylpiperidin-1-yl)oxy (TEMPO), used as reference for EPR calibration was bought from Sigma-Aldrich.

4-Amino-2,2,6,6-tetramethylpiperidine-1-oxyl (amino TEMPO), used for syntheses was bought from Tokyo Chemical Industry.

Potassium Bromide (KBr) used as passive media for EPR calibration was bought from ACROS.

Diglycidyl Ether of Bisphenol A (DGEBA), used for syntheses was bought from Sigma-Aldrich.

Isophorone Diamine (IPDA), used for syntheses was bought from Tokyo Chemical Industry.

Polypropylene glycol (PPG  $x$  with  $x$  the average molar mass in number), used for synthesis was bought from Alfa Aesar/Fisher (400 g/mol), Sigma Aldrich (725, 1000 & 4000 g/mol), Tokyo Chemical Industry (192 g/mol).

$^{13}\text{C}$ -tagged Acetate, Urea, Glycine, formate and pyruvate were bought from Sigma-Aldrich.

## 1.2 SEM characterization

Scanning Electron Microscopy experiments were performed in the “Centre Technologique des Microstructures (CT $\mu$ )” in Lyon, on a ZEISS Merlin Compact after deposition of 10 nm of copper using a BAL-TEC Med 20 coating system.

## 1.3 Characterization of porosity

### 1.3.1 Mercury intrusion porosimetry

Mercury intrusion porosimetry was performed on a AutoPore IV 9400 apparatus from Micromeritics. About 100 mg of samples was degassed in the porosimeter to less than 50  $\mu\text{m Hg}$  before the mercury intrusion. The intrusion was performed in the pressure range of 0.035 to 4000 bar, allowing the penetration of the pores of diameter ranging between 3 nm and 350  $\mu\text{m}$ , with an accuracy of about 0.25%. Based on the assumption of cylindrical pores, the apparent pore size distribution was calculated by the Washburn equation:  $D = (-4\sigma\cos\Theta)/P$ , where  $P$  is the absolute injection pressure (Pa),  $D$  is the pore access diameter (m) when mercury enters at the pressure  $P$ ,  $\Theta$  is the contact angle between mercury and the pore surface (assumed to be  $130^\circ$  in the experiments) and  $\sigma$  is the interfacial tension of mercury (set to  $0.485 \text{ J.m}^{-2}$ ). The apparent total porous volume is calculated by cumulating the incremental pore volumes between 0.65 bar and 4000 bar (which corresponds to pore diameters below 20  $\mu\text{m}$ ).

### 1.3.2 Nitrogen physisorption

Nitrogen physisorption isotherms were performed using Nitrogen at 77 K (liquid nitrogen) on an ASAP 2020 apparatus from Micromeritics. Prior to analyses, the samples (about 100 mg) were degassed at  $40^\circ\text{C}$  for at least 3 h. Adsorption and desorption isotherms were run in a range of relative pressures from  $P/P_0 = 0.05$  to 0.98

## 1.4 Rheology

In situ monitoring of the curing reaction was carried out using a HAAKE MARS 60 rheometer from Thermo Fisher using 60 mm plan geometries and gap about 250  $\mu\text{m}$ . Initially, the low-viscosity fluid was characterized at constant shear rate ( $\dot{\gamma}=10 \text{ s}^{-1}$ ) until the viscosity increased above 0.2 Pa.s. Subsequently, oscillatory shear ( $\omega=10 \text{ rad.s}^{-1}$ ) at constant stress ( $\tau=1 \text{ Pa}$ ) were carried out to monitor the gelation.

## 1.5 EPR

Electron paramagnetic resonance (EPR) experiments were performed on a continuous wave X band EMXnano apparatus from Bruker. Microwave source is working at 9.63 GHz and experiments were performed at 343 mT with 40 mT of

sweeping. Analyses were performed using 4 mm quartz tubes bought from Wildman. Data processing and especially baseline correction were performed manually on Matlab, using polynomials fits.

## 2 HYPOP-I Synthesis, Preparation & Analysis

### 2.1 HYPOPs Synthesis and Preparation

The synthesis of HYPOP samples is performed by weighting aminoTEMPO in a round bottom 14 mL polypropylene tube. As amino TEMPO is highly hygroscopic, this procedure is carried out in a glovebox. Quickly after removing the tube from the glovebox are added DGEBA, IPDA and PPG (See Table S). After mild heating of the mixture to decrease viscosity, it is thoroughly degassed using high vacuum and intense stirring. When the sample is fully homogeneous, transparent and bubble-free the tube is put in a dry bath heater (Corning LSE) and cured at 102°C for 24h.

After the curing reaction, the post-polymerization process consists in i) trimming edges where a skin layer has formed, ii) washing in large amounts of ethanol (3 times) and DI-water (3 times). After the last washing step with water, the wet samples are frozen in liquid nitrogen and freeze-dried (Freezone 4.5 from Labconco,  $P=0.01$  mbar,  $T_{\text{collector}}=-104^{\circ}\text{C}$ ). Dry HYPOPs are manually crushed then sifted before being analyzed with EPR or used in dDNP experiments. HYPOP are stored at room temperature and atmospheric conditions in polypropylene tubes. The radical concentration remains stable for over a year in such conditions.

### 2.2 HYPOP-I composition

| Final radical concentration<br>$\mu\text{mol.g}^{-1}$ | Mass weighted |           |                  |          |           | Initial concentration of amino TEMPO<br>( $\mu\text{mol.g}^{-1}$ ) | Radical survival yield |
|-------------------------------------------------------|---------------|-----------|------------------|----------|-----------|--------------------------------------------------------------------|------------------------|
|                                                       | PPG (g)       | DGEBA (g) | amino TEMPO (mg) | IPDA (g) | Total (g) |                                                                    |                        |
| <b>17</b>                                             | 5.1           | 0.712     | 7.8              | 0.1805   | 6         | 50.6                                                               | 33.6 %                 |
| <b>29</b>                                             | 5.1           | 0.713     | 11.6             | 0.182    | 6.01      | 76.6                                                               | 37.9 %                 |
| <b>44</b>                                             | 5.1           | 0.737     | 18.2             | 0.173    | 6.03      | 114.5                                                              | 38.4 %                 |
| <b>63</b>                                             | 5.115         | 0.7144    | 26.3             | 0.171    | 6.03      | 168.4                                                              | 37.4 %                 |
| <b>95</b>                                             | 5.1           | 0.696     | 38.7             | 0.166    | 6.00      | 250.9                                                              | 37.9 %                 |
| <b>116</b>                                            | 5.12          | 0.689     | 57.9             | 0.155    | 6.02      | 374.9                                                              | 30.9 %                 |
| <b>191</b>                                            | 5.1           | 0.657     | 87.4             | 0.141    | 6.00      | 564.9                                                              | 33.8 %                 |
| <b>286</b>                                            | 5.117         | 0.654     | 130              | 0.122    | 6.02      | 837.8                                                              | 34.1 %                 |

*Table S1: Composition of HYPOP-I samples. The composition selected for HYPOP-A sample is highlighted.*

## 2.3 SEM analyses of porous samples with varying compositions

Solvent: Polypropylene Glycol 1000 g/mol at 50%<sub>wt</sub>

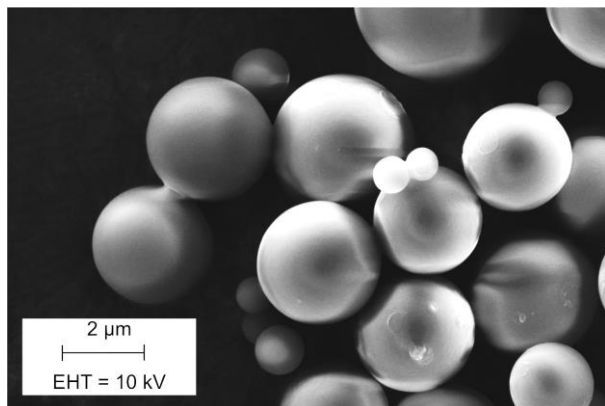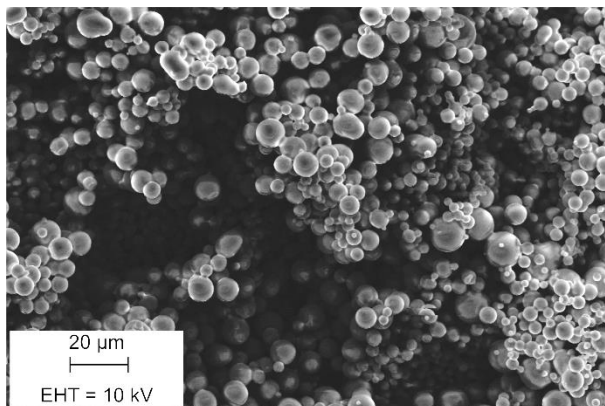

Solvent: Polypropylene Glycol 725 g/mol at 60%<sub>wt</sub>

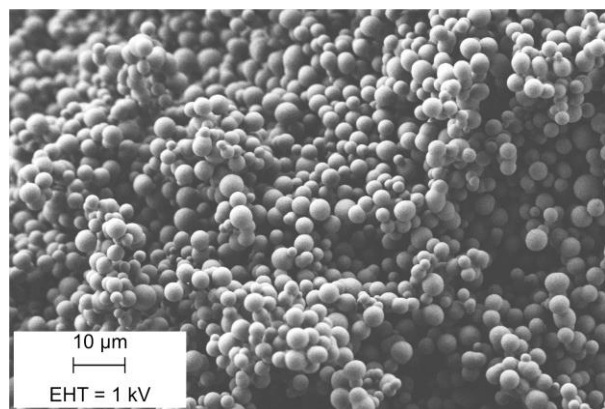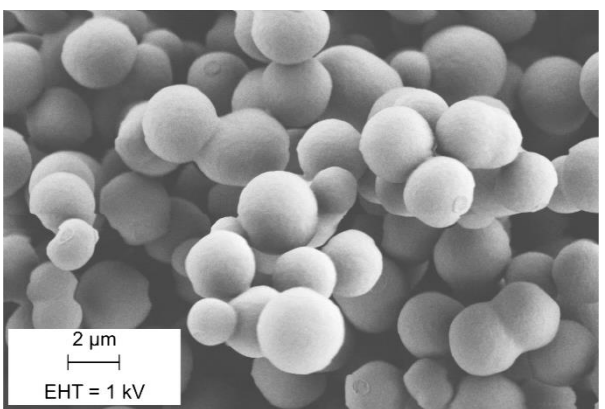



Solvent: Polypropylene Glycol 400 g/mol at 85% wt

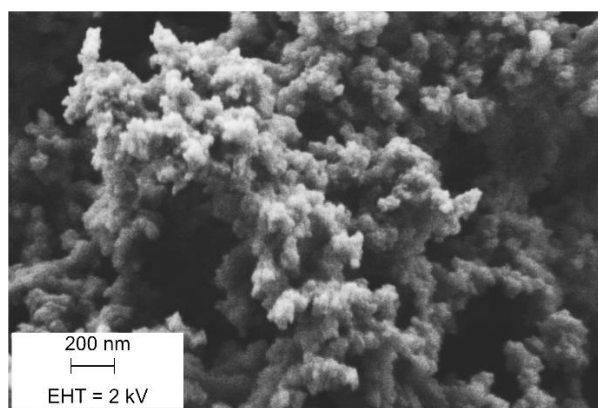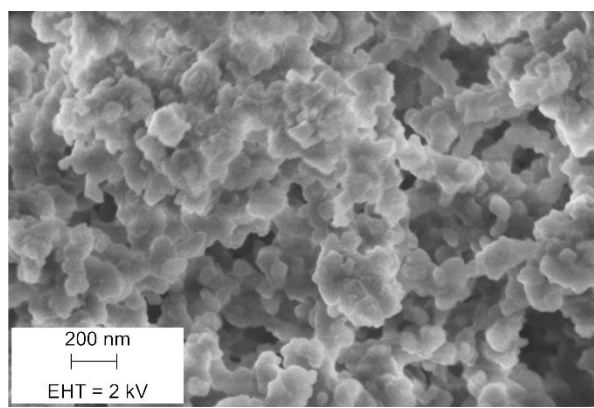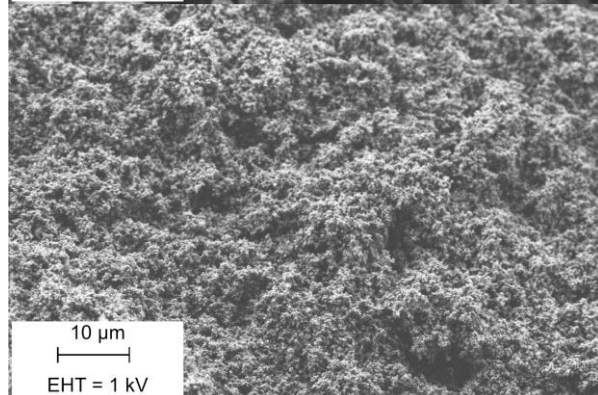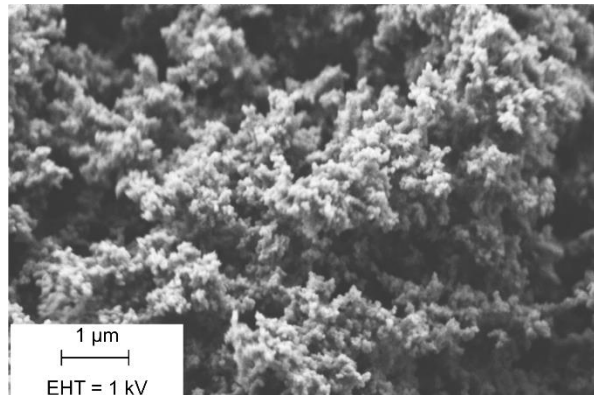

Solvent: Polypropylene Glycol 200 g/mol at 90% wt

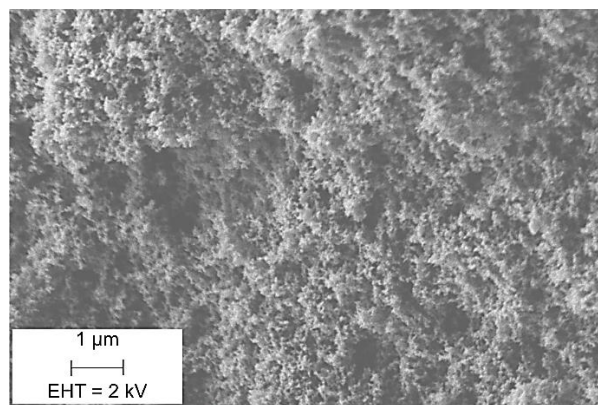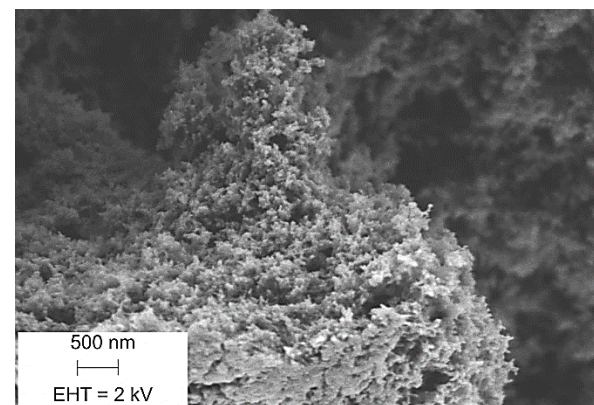

## 2.4 SEM analyses of HYPOP-I samples

Polymer powder [250 $\mu$ m-500 $\mu$ m] particle size

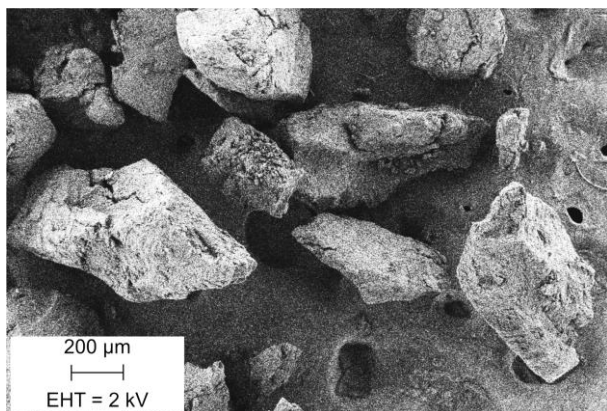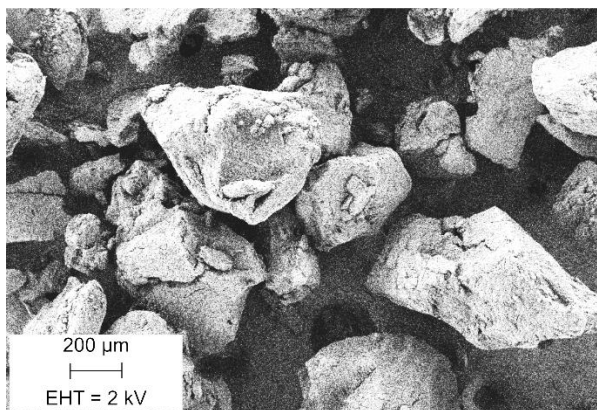

285  $\mu$ mol.g<sup>-1</sup>

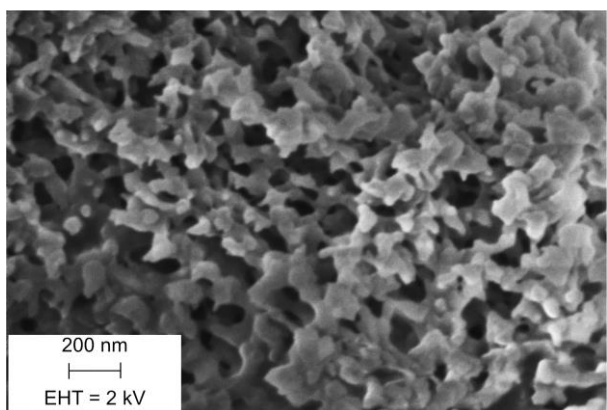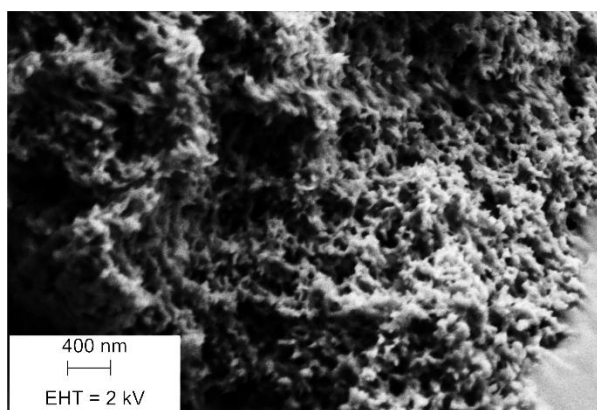

192  $\mu$ mol.g<sup>-1</sup>

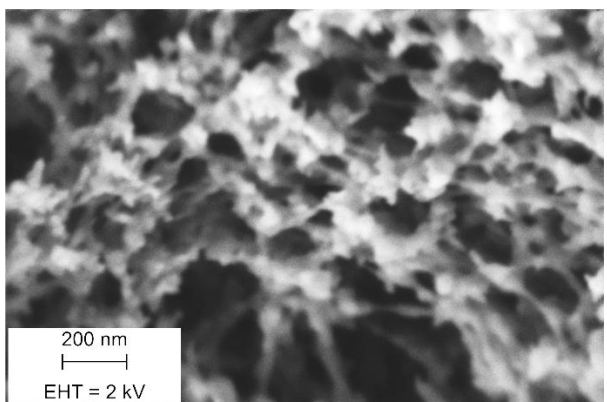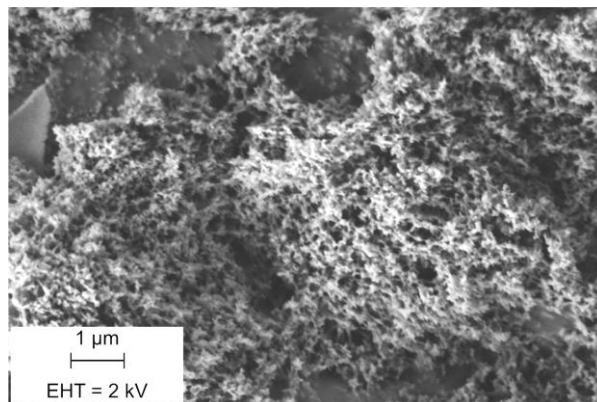



93  $\mu\text{mol.g}^{-1}$

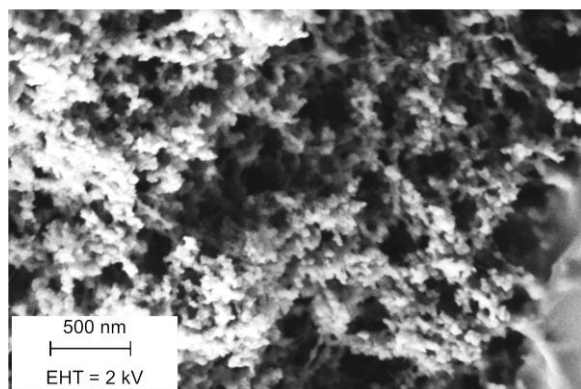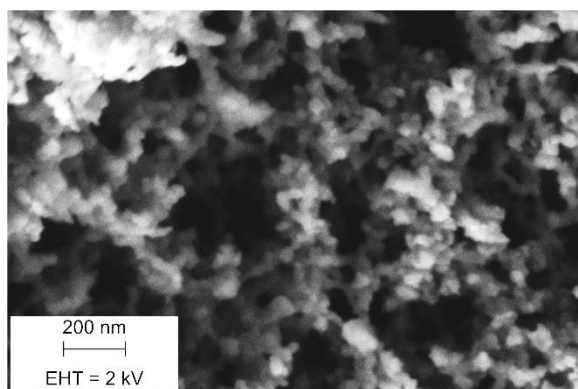

63/ 62  $\mu\text{mol.g}^{-1}$

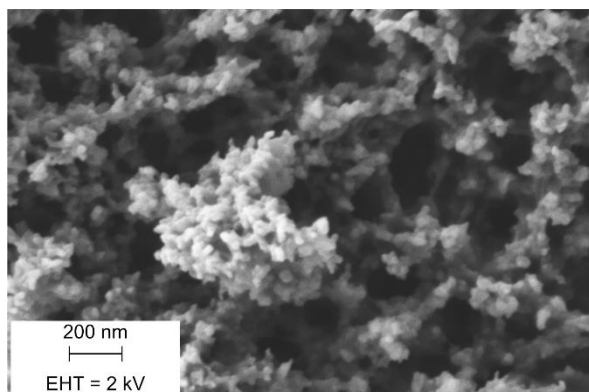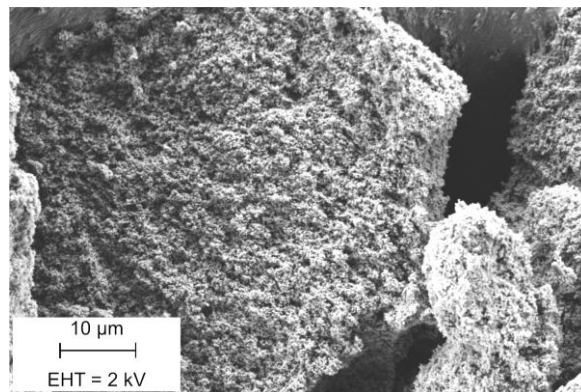

45  $\mu\text{mol.g}^{-1}$

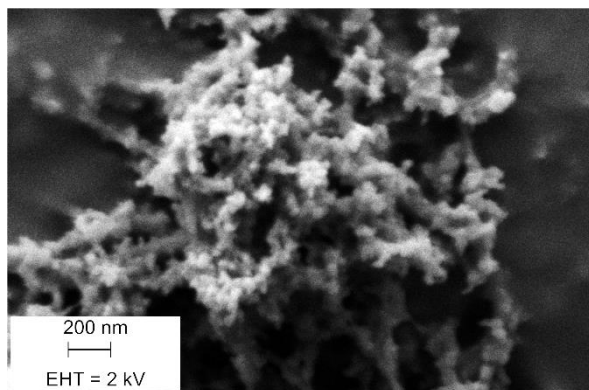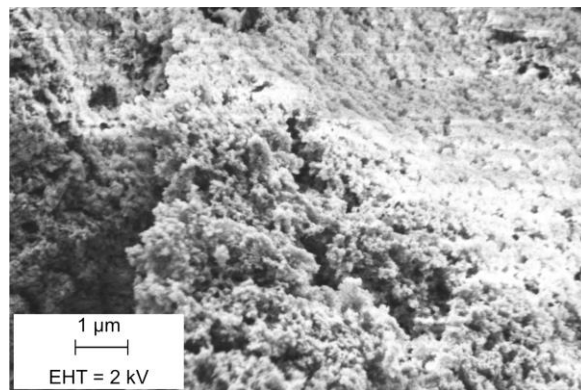



26  $\mu\text{mol. g}^{-1}$ :

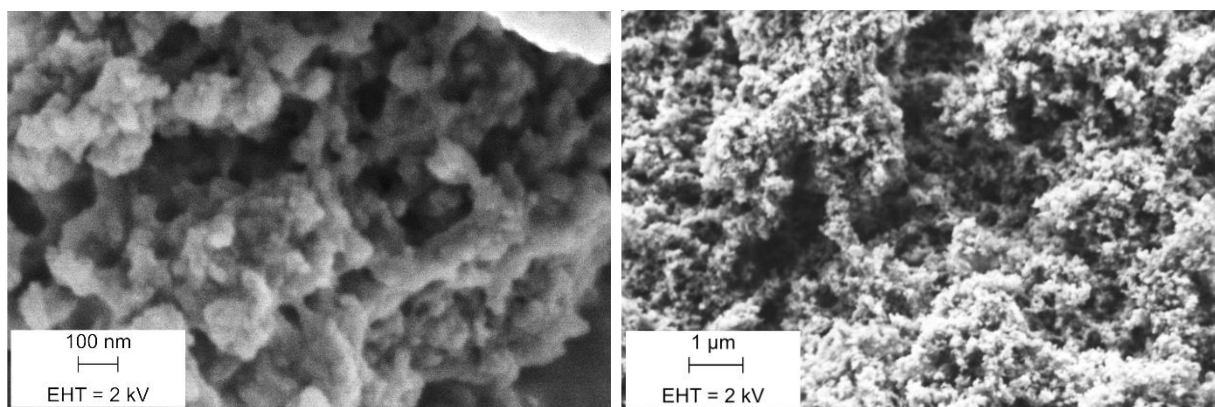

16  $\mu\text{mol. g}^{-1}$ :

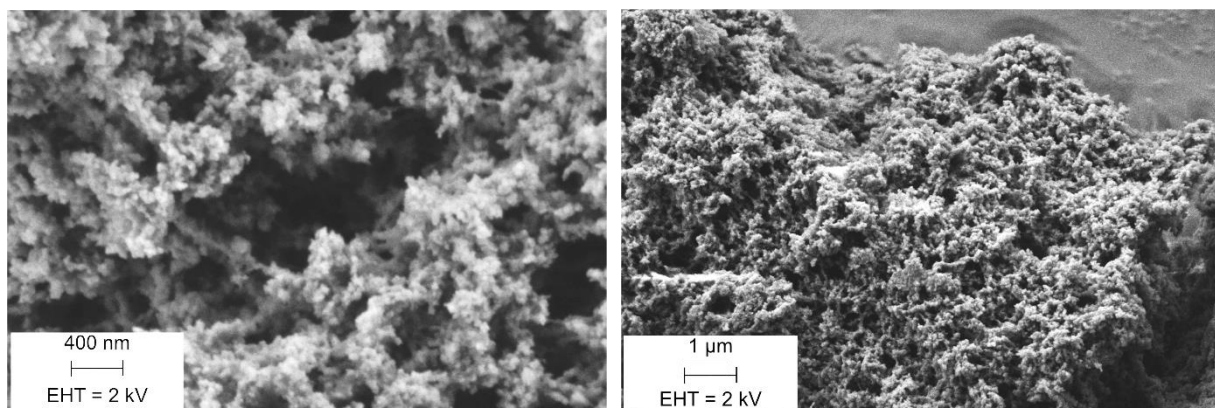

**Figure S1:** SEM Images of HYPOP-I samples used in DNP / EPR.

## 2.5 Monitoring of the curing by rheology

We monitored the curing kinetics of a TEMPO-free sample comprising 85%<sub>w</sub> of PPG 400 g/mol as described above (*Figure S2*). While the initial phase separation, indicated by a first increase of the viscosity, appears after 3 h of reaction, the subsequent increase of the storage modulus ( $G'$ ), indicative of the formation of a network between aggregated particles, occurs about 30 min later and slowly continues to progress, reaching a value at 90% of maximum after 15 h.

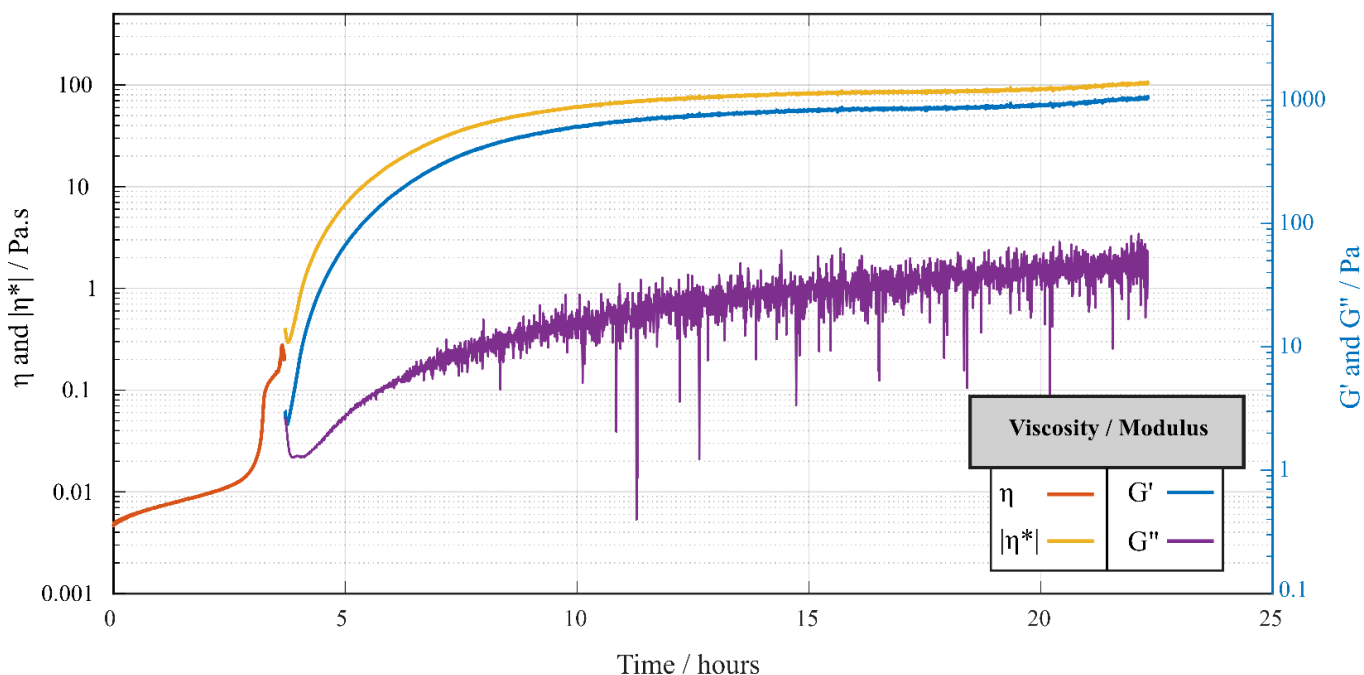

**Figure S2:** In situ monitoring of the curing process using 85%<sub>w</sub> of PPG 400 g/mol. Up to 3h (red curve), constant shear rate of  $10 \text{ s}^{-1}$  is applied. In proximity to the gel point, oscillatory shear ( $1 \text{ Pa}$ ,  $10 \text{ rad.s}^{-1}$ ) is applied.

## 2.6 Mercury Intrusion Porosimetry

In contrast to SEM observation that could not demonstrate significant changes of morphologies within the HYPOP-I series, mercury intrusion porosimetry indicates a significant shift in the size distribution of pores when large amounts of amino TEMPO are used (Fig. S3).

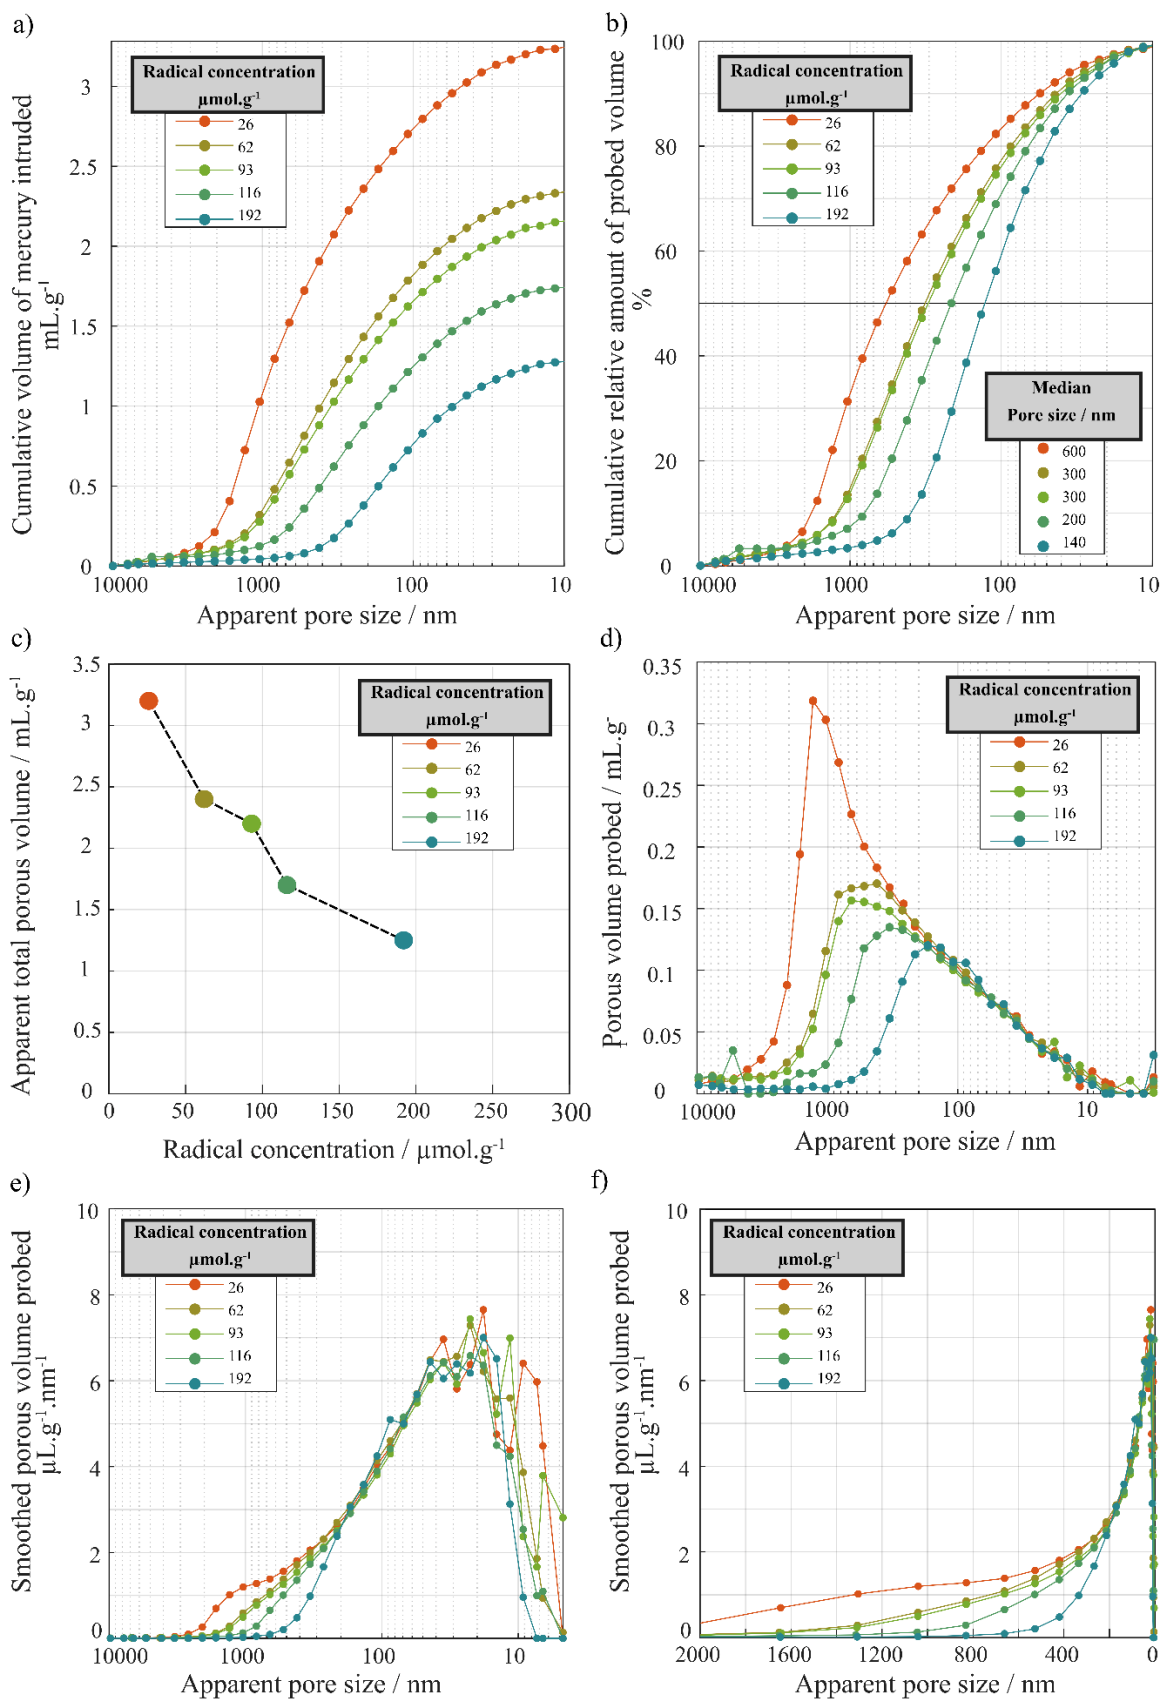

**Figure S3:** (a) Cumulative volume of mercury introduced in polymers. (b) Relative volume filled by mercury in function of apparent pore size. (c) Total volume probed in function of radical concentration. (d) Distribution of the probed volume depending on apparent pore size. (e) Smoothed distribution of the probed volume (f) Linear scale of (e).

## 2.7 Nitrogen physisorption

Mercury intrusion porosimetry may induce isostatic compression of the porous samples, especially when pore sizes lower than 100 nm are probed (this corresponds to Hg pressures above 10 MPa). Thus, we also complemented the porosity characterization with nitrogen physisorption (Figure S4). While this technique is less invasive in terms of pore deformation, it can only probe pore sizes in the 1-100 nm range. The type-II isotherms displayed by all HYPOP-I samples confirms that these samples are essentially macroporous (pore size above 50 nm) and indicate significantly lower pore volume for samples containing 192 and 285  $\mu\text{mol/g}$  of radicals.

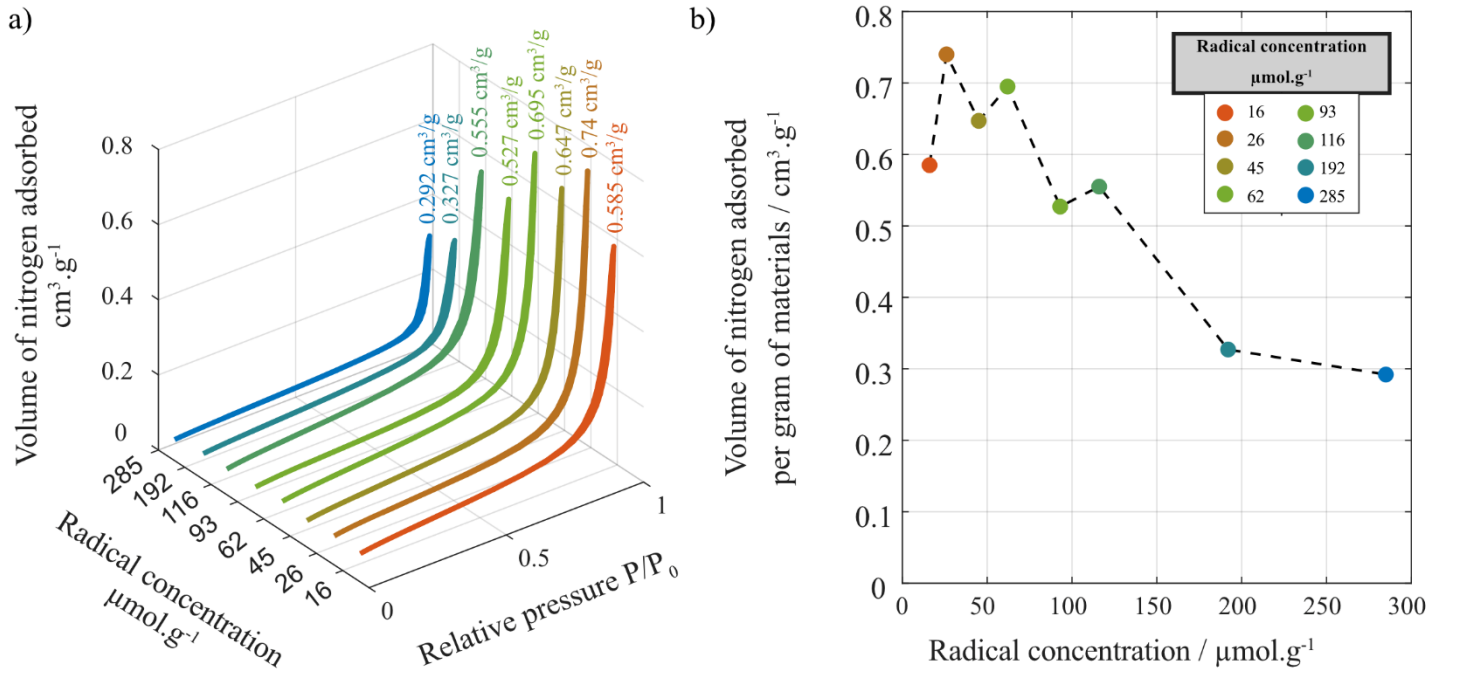

**Figure S4:** (a) Nitrogen Adsorption/Desorption isotherms for the HYPOP-I samples (labels corresponds to the cumulative volume of nitrogen adsorbed in pores lower than 100 nm). (b) Impact of the composition of HYPOP-I samples on the global probed pore volume.

## 3 Quantification of Radical Concentration in HYPOP-I by EPR

### 3.1 Method

Powders were prepared by crushing the polymers with a lancet, and sorted with a range of sieves (1 mm / 500  $\mu\text{m}$  / 250  $\mu\text{m}$  thresholds). Intermediate fractions (1 mm > d > 500  $\mu\text{m}$ , and 500  $\mu\text{m}$  > d > 250  $\mu\text{m}$ ) were kept and used for analyses and DNP experiments. The powders were packed into 4 mm quartz tubes (20 mm height, about 20 mg) and analyzed with EPR. The corresponding spectra were integrated a first time before baseline correction. After that, the spectra were integrated a second time and corrected using the following formula:<sup>1</sup>

$$I_{corrected} = \frac{\iint_{325}^{355} S(B_0) dB_0}{Q_{factor} \times B \times \sqrt{P} \times NS \times 10^{\frac{20}{RG}} \times T_c}$$

with:

- $Q_{factor}$  Quality factor of the cavity under experimental conditions.
- $B_0$  Magnetic field (mT).



- $B$  Field modulation (Gauss).
- $P$  Microwaves power (mW).
- $T_c$  Conversion time (ms).
- $NS$  Number of scans.
- $RG$  Receiver gain (dB).

$NS$  and  $RG$  were both directly taken into account by the software, and  $T_c$  was kept constant for all experiments.

## 3.2 Calibration

To properly calibrate our measure of radical concentration, we prepared a large range of solid dilutions of fresh TEMPO in KBr and analyzed them at room temperature. Those standards were mixed then ground before being used in EPR. After analysis of results, we obtained the following calibration curve (*Figure S5*). Uncertainty was calculated by correcting the standard deviation of residuals by the adapted Student factor (degree of freedom: 17 / Risk: 1% / t-factor = 2.55).<sup>2</sup> Residuals were plotted to check absence of trends that would discredit the affine model.

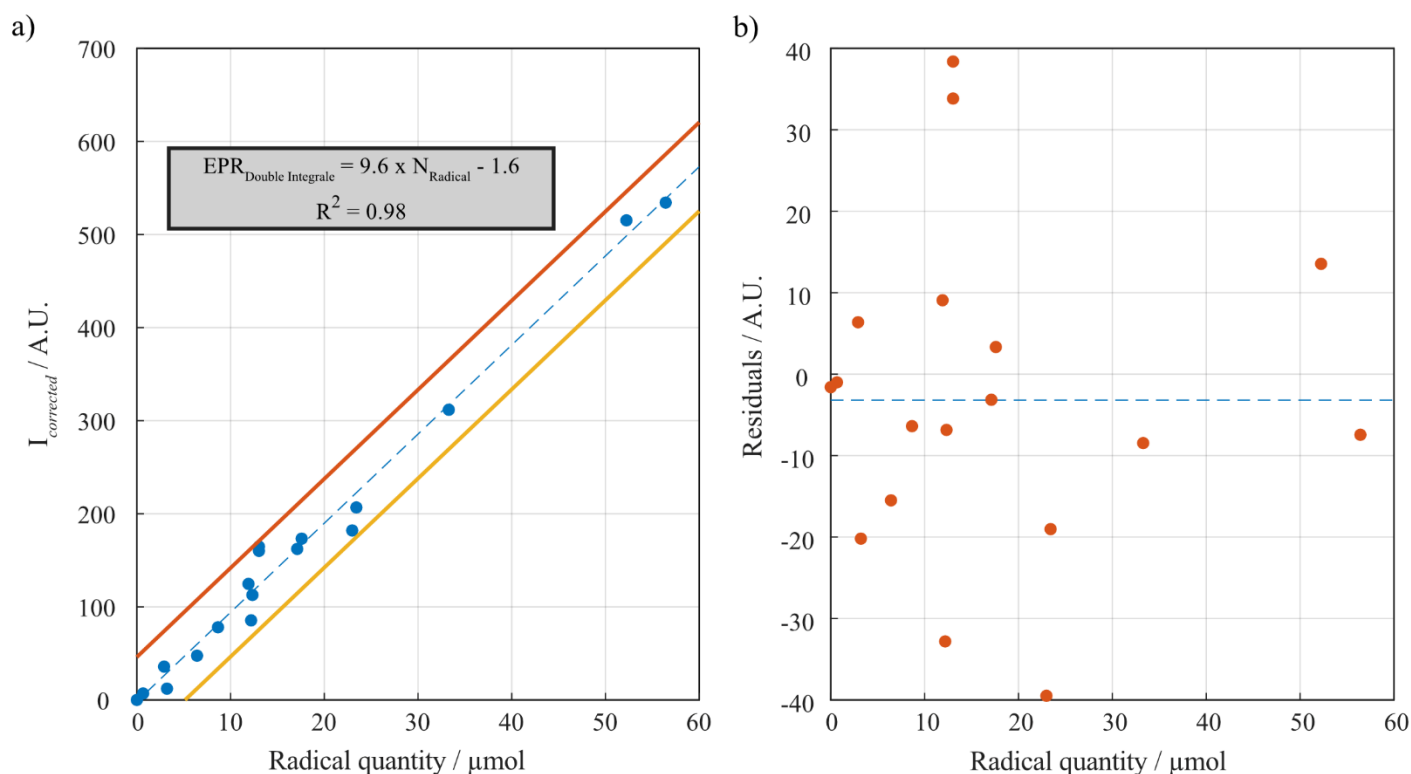

**Figure S5:** (a) Calibration curve of radical quantification (b) Residuals.

### 3.3 EPR spectra and quantification of radicals

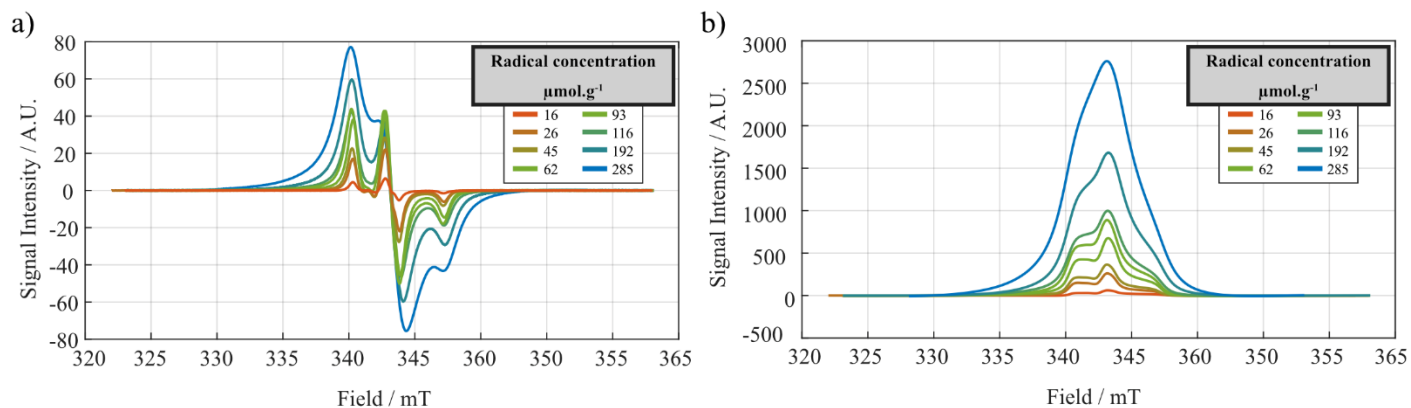

**Figure S6:** EPR spectra of HYPOP-I samples (a) before and (b) after initial integration and baseline correction.

| Double integration value (AU) | Modulation (G) | Microwave Power (mW) | Q factor | Weight (mg) | I corrected (AU) | Radical Concentration ( $\mu\text{mol g}^{-1}$ ), $\pm 5 \mu\text{mol g}^{-1}$ |
|-------------------------------|----------------|----------------------|----------|-------------|------------------|--------------------------------------------------------------------------------|
| 2900                          | 1              | 0.1                  | 5414     | 21.5        | 0.7              | 16                                                                             |
| 5800                          |                | 0.1                  | 5636     | 19.2        | 3.3              | 26                                                                             |
| 14000                         |                | 0.1                  | 5945     | 20.8        | 7.4              | 45                                                                             |
| 20000                         |                | 0.1                  | 5681     | 21.3        | 11.1             | 62                                                                             |
| 28000                         |                | 0.1                  | 5241     | 20.8        | 16.9             | 93                                                                             |
| 50000                         |                | 0.1                  | 6020     | 25.0        | 26.3             | 116                                                                            |
| 98000                         |                | 0.1                  | 6094     | 28.5        | 50.9             | 192                                                                            |
| 167000                        |                | 0.1                  | 5682     | 34.7        | 92.9             | 285                                                                            |

**Table S2:** Experimental parameters used for the measure of radical concentration in HYPOP-I samples

## 4 NMR pulses sequences

### 4.1 Thermal equilibrium & DNP buildup

Thermal equilibrium, background and proton DNP build up spectra have been obtained using the following pulse sequence:

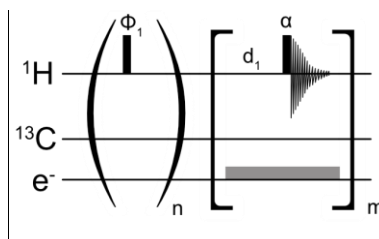

**Figure S7:** Pulse sequence used to obtain proton DNP build up. Alpha is a small angle pulse (maximum  $5^\circ$ ) calibrated through a nutation experiment and  $n=50$ .

## 4.2 Cross-polarization

Cross-polarization is realized with a homemade coils described in a previous article.<sup>3</sup>

Adiabatic half passage chirp pulse have been built with half WURST pulse, 100 kHz broad with 500 point spread in 175  $\mu$ s in both channels (150 W for  $^{13}\text{C}$ , 12 W for  $^1\text{H}$ ). Contact is realized with 6 ms contact pulses empirically chosen as 100-50-100 pulse on carbon-13 and square pulse on  $^1\text{H}$  (26 kHz  $^{13}\text{C}$  at 150 W and 14 kHz  $^1\text{H}$  at 7 W).

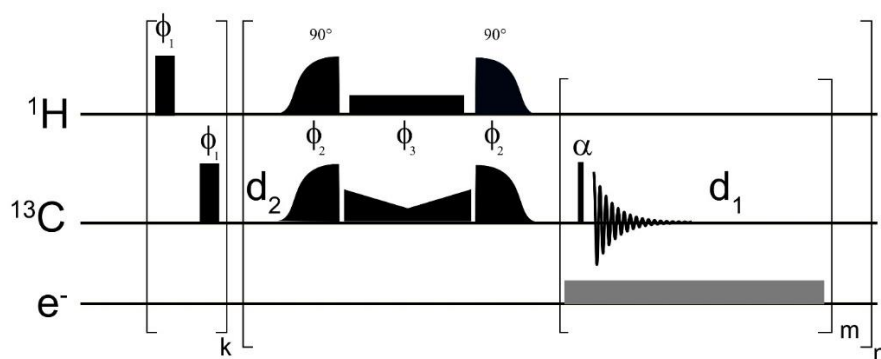

**Figure S8:** Pulse sequence for the cross-polarization used in the d-DNP experiments,  $\alpha=5^\circ$ ,  $k=50$ ,  $m=6$ ,  $n=32$ ,  $d1=30$  s,  $\Phi_1=[x,y,-x,-y,-y,y,x,-x,-y,-y,-x]$ ,  $\Phi_2=[x]$ ,  $\Phi_3=[y]$ .

## 5 Impregnation with a given solvent

### 5.1 Methods of impregnation

Solutions were loaded inside HYPOP using the incipient wetness impregnation technic by pouring 3 times the HYPOP mass as solution for HYPOP containing less than 192  $\mu\text{mol.g}^{-1}$  of radical and 2 times if else.

### 5.2 Swelling measurements

Ideally, the target solutions should only impregnate the porous volume of HYPOPs. However, potential affinity of solvents or analytes for the epoxy may also induce diffusion into the polymer particles and an overall swelling of the porous material. Not only is this swelling detrimental to the extraction yield of hyperpolarized analytes, but it may also drastically reduce the hyperpolarization lifetime by facilitating relaxation towards PAs through  $^{13}\text{C}$ - $^{13}\text{C}$  spin diffusion or weaken the mechanical properties of the polymer network. To estimate this swelling phenomenon, we measured the mass before and after impregnation of a porous monolith (between 250 and 550  $\text{mm}^3$  dry) immersed in various solvents for two hours. By comparing masses before and after with respect to solvent density it is possible to obtain a global impregnation volume that includes both the porous and swelling volumes. PPG-4000 was used as a reference solvent, able to impregnate the porous volume but unable to swell the epoxy particles.

**Impregnated volume** was calculated with the formula:

$$V_i = \frac{(m_f - m_i)}{\rho_s \times m_i},$$

with:

- $V_i$  Impregnated volume per gram for a given solvent ( $\text{mL.g}^{-1}$ ).
- $m_i$  &  $m_f$  respectively masses before and after impregnation of the polymer block (g).
- $\rho_s$  Volumic mass of the solvent ( $\text{g.mL}^{-1}$ ).

**Swelling volume** was calculated with the formula:

$$V_s = V_i - V_{i\text{ref}},$$

with:

- $V_s$  Swelling volume per gram for a given solvent ( $\text{mL.g}^{-1}$ ).
- $V_i$  &  $V_{i\text{ref}}$  Respectively impregnated volume per gram for a given solvent and for the reference: PPG 4000  $\text{g/mol}$  ( $\text{mL.g}^{-1}$ ).

**Apparent porosity** was calculated with the formula:

$$P_{\%} = 100 \times \left( \frac{V_i}{\frac{m_i}{\rho_p} + V_i} \right),$$

with:

- $P_{\%}$  Apparent porosity of the polymer (%).
- $V_i$  Impregnated volume per gram for a given solvent ( $\text{mL.g}^{-1}$ ).
- $m_i$  Mass before impregnation of the polymer block (g).
- $\rho_p$  Volumic mass of the polymer which has been found to be  $1.006 \text{ (g.mL}^{-1}\text{)}$ .

**Percentage of swelling** was calculated with the formula:

$$S_{\%} = 100 \times \left( \frac{V_s}{V_i} \right),$$

with:

- $S_{\%}$  Part of swelling during impregnation (%).
- $V_s$  Swelling volume per gram for a given solvent ( $\text{mL.g}^{-1}$ ).
- $V_i$  Respectively impregnated volume per gram for a given solvent and as reference: PPG 4000  $\text{g.mol}^{-1}$  ( $\text{mL.g}^{-1}$ ).

| Solvent                     | Initial mass of polymer (mg) | Final mass after impregnation (mg) | Volume impregnated per polymer mass ( $\text{mL.g}^{-1}$ ) | Swelling ( $\text{mL.g}^{-1}$ ) | Real Porosity | Apparent porosity | Percentage of swelling |
|-----------------------------|------------------------------|------------------------------------|------------------------------------------------------------|---------------------------------|---------------|-------------------|------------------------|
| <b>PPG-4000 (reference)</b> | 110                          | 563                                | 4.1                                                        | 0                               | 80.4%         |                   | 0%                     |
| <b>Ethanol</b>              | 64.4                         | 342                                | 5.5                                                        | 1.4                             |               | 84.5%             | 25%                    |
| <b>Dimethyl sulfoxide</b>   | 96                           | 876                                | 7.4                                                        | 3.3                             |               | 88.1%             | 44%                    |
| <b>Ethanol:water 10:90v</b> | <b>75.5</b>                  | <b>394</b>                         | <b>5.1</b>                                                 | <b>1.0</b>                      |               | <b>83.6%</b>      | <b>19%</b>             |
| <b>Acetonitrile</b>         | 83.5                         | 388                                | 4.6                                                        | 0.5                             |               | 82.3%             | 12%                    |
| <b>Dichloromethane</b>      | 112.7                        | 1020                               | 6.1                                                        | 2.0                             |               | 85.8%             | 32%                    |
| <b>Acetone</b>              | 82.5                         | 408                                | 5.0                                                        | 0.9                             |               | 83.4%             | 18%                    |

**Table S3:** Calculation of effective porosity and swelling volumes for the porous sample containing 85%<sub>wt</sub> of PPG-400.



## 6 Filtration system

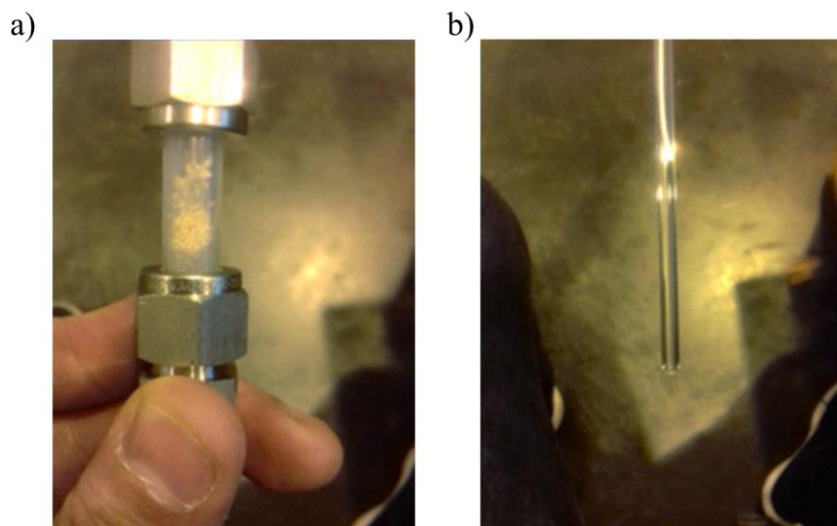

**Figure S9:** (a) In-line filter containing glass fibers, that retains HYPOP powder during the dissolution and transfer step. (b) final hyperpolarized solution transferred into a 5 mm NMR tube.

## 7 Microwaves optimization at 1.2K and 7.05 T, on HYPOP-I:

Microwaves were optimized on dry / Impregnated HYPOP, without observing any change on optimal frequency.

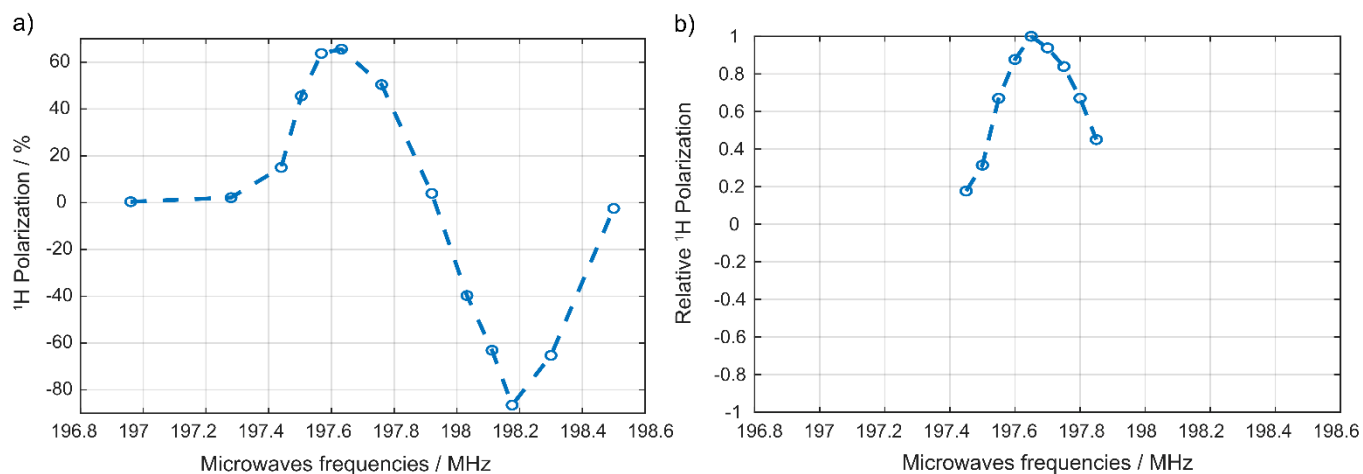

**Figure S10:** DNP spectra for both dry and impregnated HYPOP. (a) 192 mM HYPOP impregnated with 10 M  $^1\text{H}$  solution. (b) 285 mM HYPOP dry.

## 8 Polarization quantification

### 8.1 Method for polarization quantification in solid state

Overall extent of polarization obtained in DNP were calculated by the following calculation:

$$P = P_{eq} \times \frac{I_{DNP}}{(I_{TE} - I_{Background})} \times \frac{G_{TE} \times NS_{TE} \times \theta_{TE}}{G_{DNP} \times NS_{DNP} \times \theta_{DNP}},$$

with:

- $TE$  Thermal Equilibrium (NMR signal recorded at 3.8 K after reaching Boltzmann equilibrium)
- $Background$  NMR Signal received from the empty sample cup (Recorded at 3.8 K with same parameters than the Thermal Equilibrium)
  
- $P$  Polarization.
- $P_{eq}$   $^1\text{H}$  polarization due to Boltzmann equilibrium at a given temperature and magnetic field (0.19 at 3.8 K and 7.05 T)
- $I$  Intensity of the integrated spectra.
- $G$  Receiver Gain (dB).
- $\theta$  Pulse angle (Calibrated through a nutation experiment).
- $NS$  Number of scans.

## 8.2 Dry HYPOP $^1\text{H}$ DNP build-ups

\* Due to some technical difficulties (wrong microwave frequency was initially used) the  $^1\text{H}$  build-up of dry HYPOP at  $192\ \mu\text{mol.g}^{-1}$  (Fig 3a in main text) was performed in two steps. Therefore, final polarization level is accurate while RDNP measurement is not.

$\Delta$  Dry HYPOP at  $285\ \mu\text{mol.g}^{-1}$  gave a thermal signal too weak to provide a reliable measure of the polarization. Thus only  $R_{\text{DNP}}$  was indicated (Fig 3b in main text).

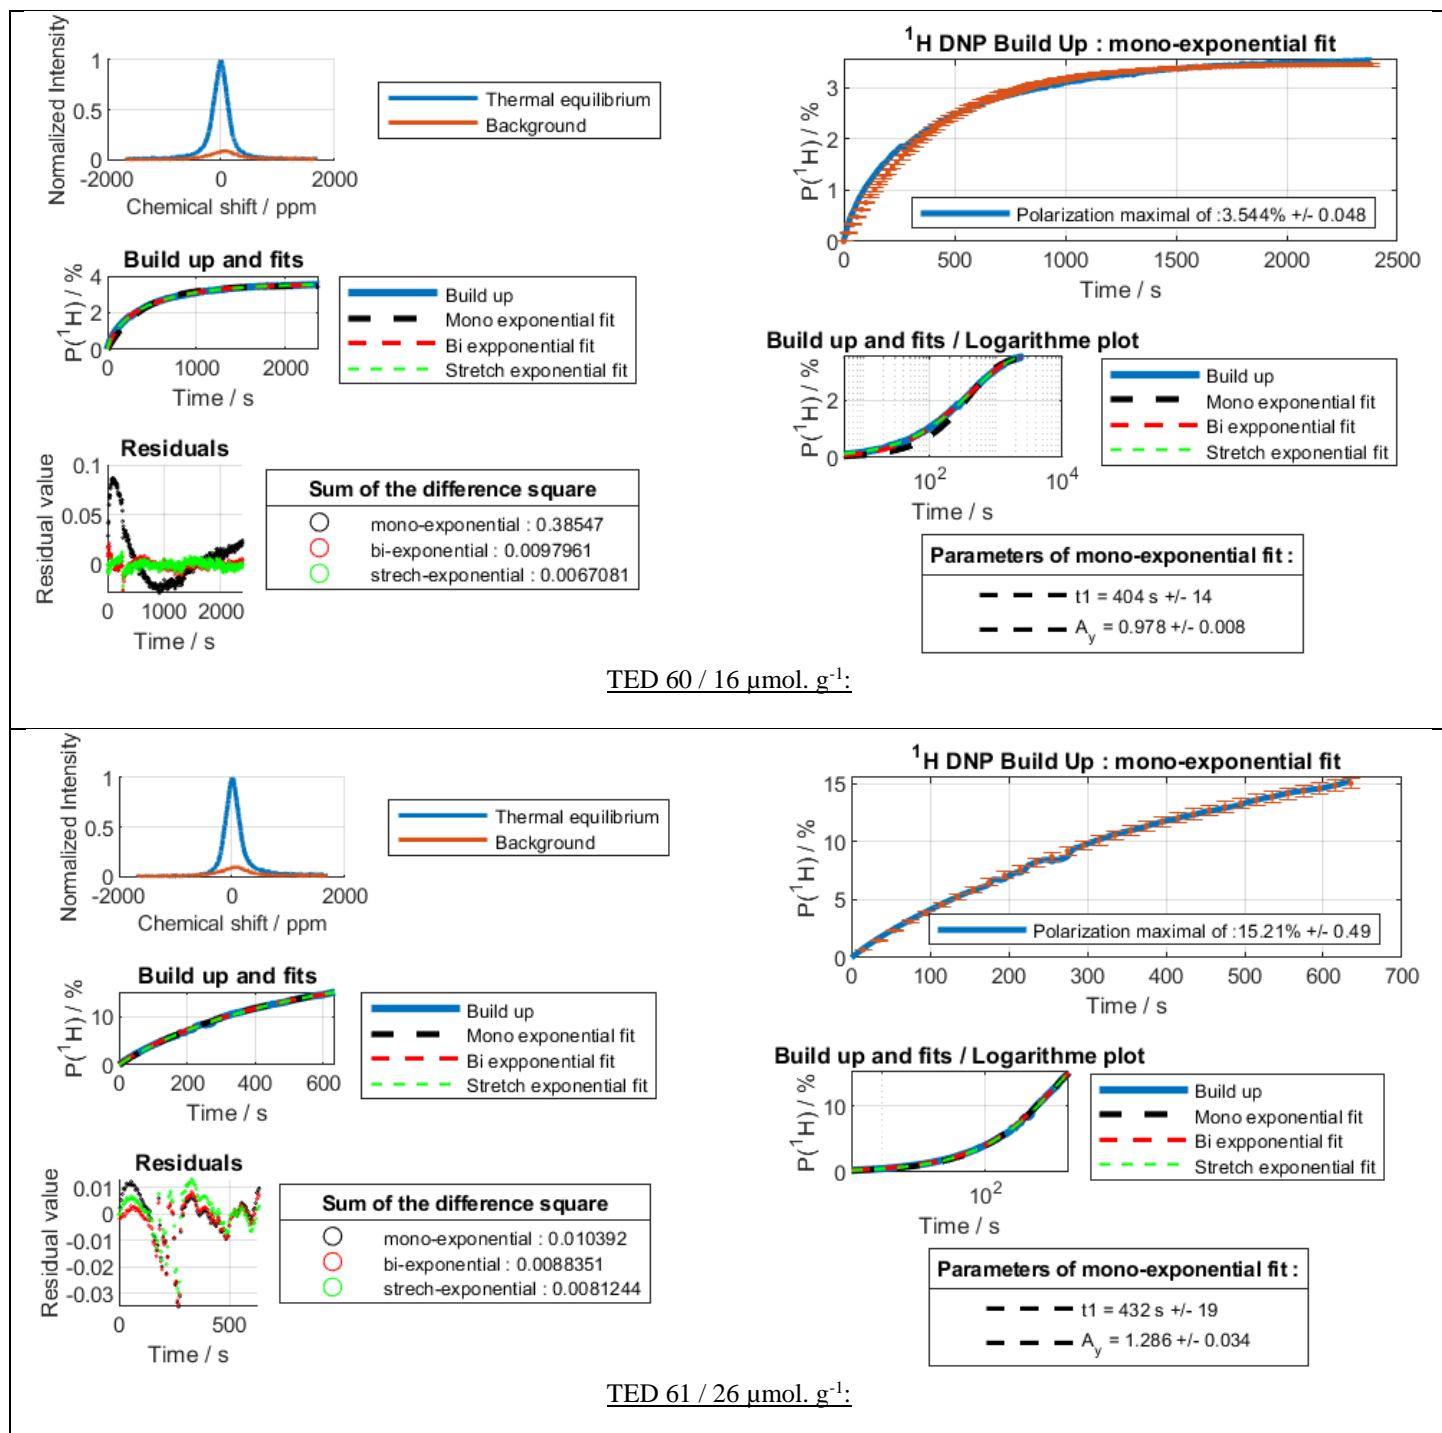

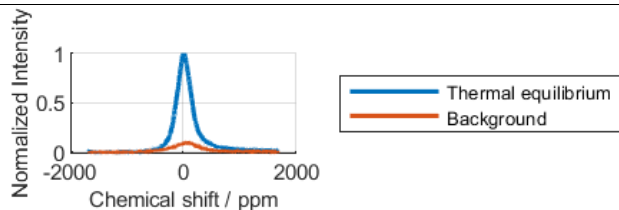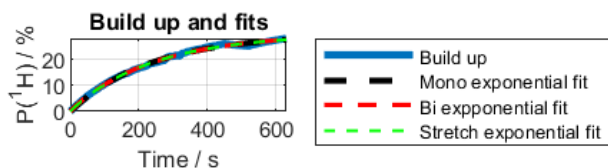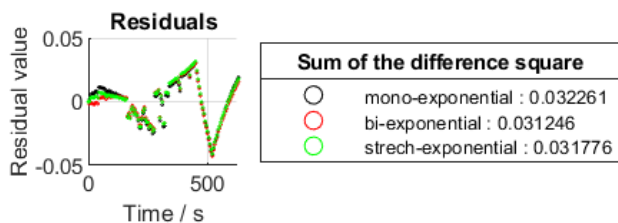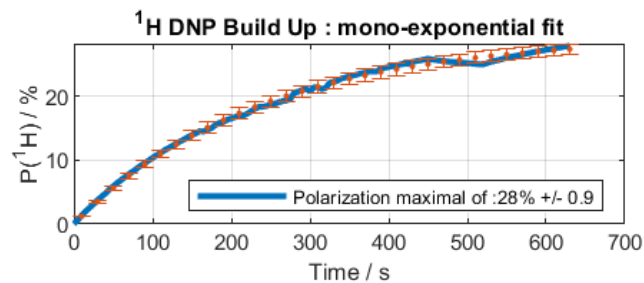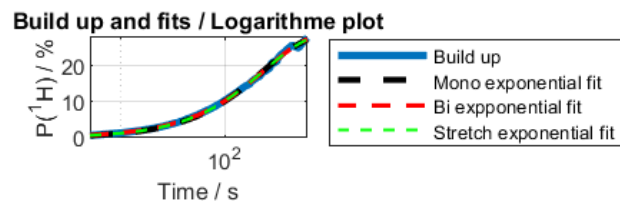

Parameters of mono-exponential fit :

- $t_1 = 236 \text{ s} \pm 16$
- $A_y = 1.054 \pm 0.03$

TED 62 / 45  $\mu\text{mol. g}^{-1}$ :

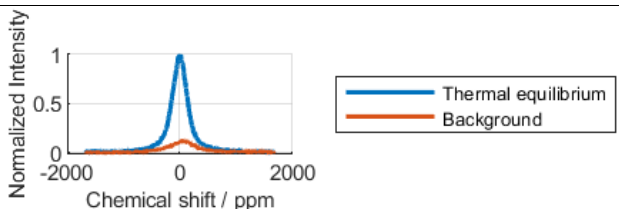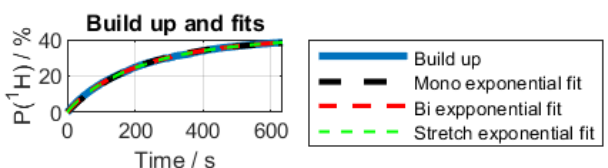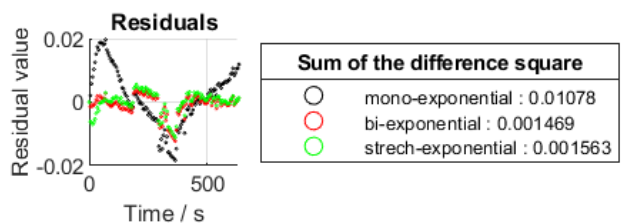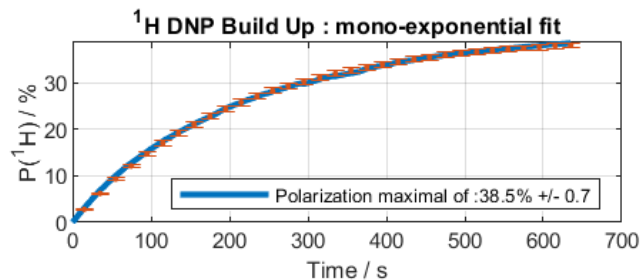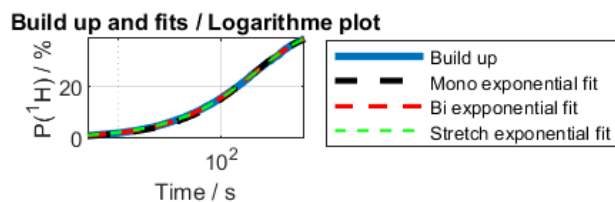

Parameters of mono-exponential fit :

- $t_1 = 207 \text{ s} \pm 8$
- $A_y = 1.037 \pm 0.014$

TED 63 / 62  $\mu\text{mol. g}^{-1}$



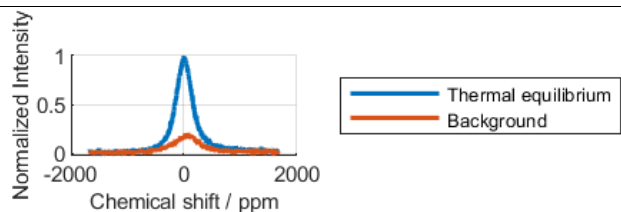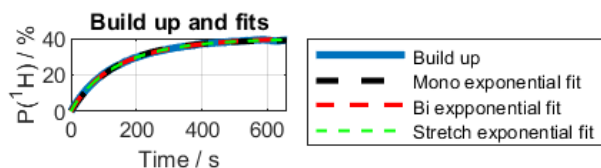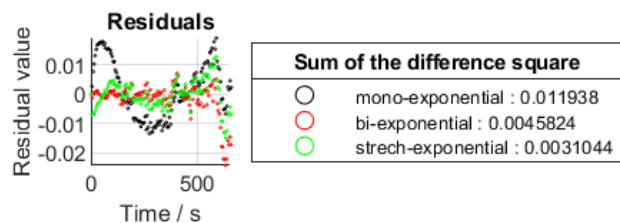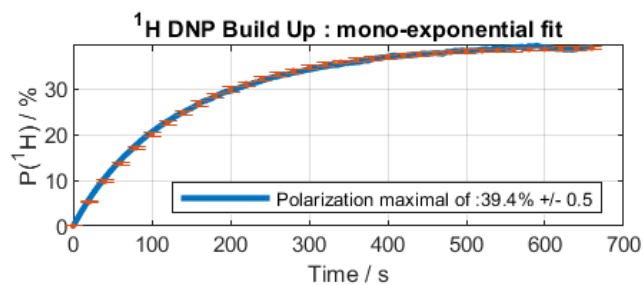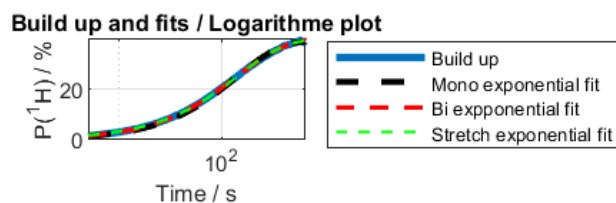

**Parameters of mono-exponential fit :**

---  $t_1 = 139.9 \text{ s} \pm 4.5$

---  $A_y = 0.995 \pm 0.009$

TED 64 / 93  $\mu\text{mol. g}^{-1}$

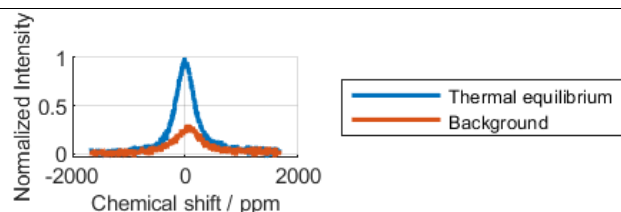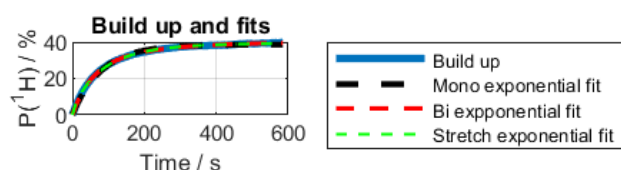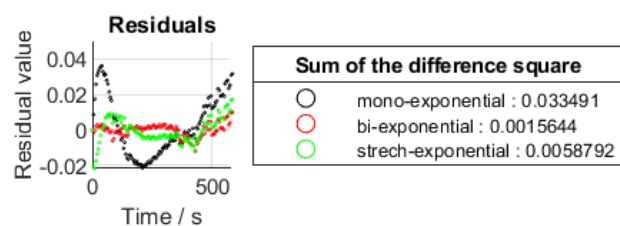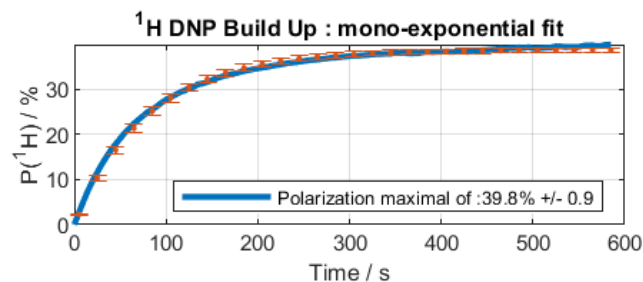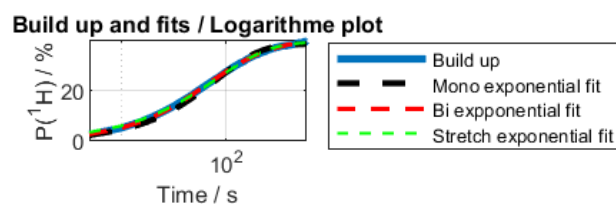

**Parameters of mono-exponential fit :**

---  $t_1 = 80.8 \text{ s} \pm 5$

---  $A_y = 0.969 \pm 0.012$

TED 65 / 116  $\mu\text{mol. g}^{-1}$

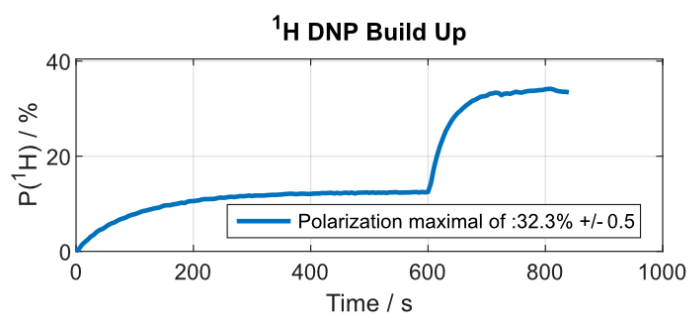

## Part 1

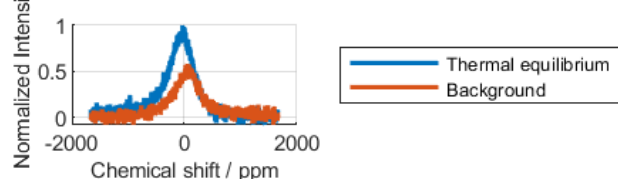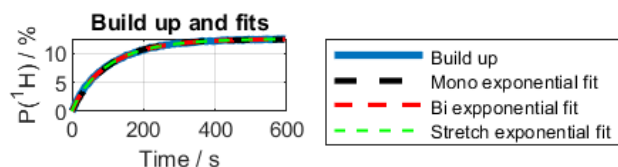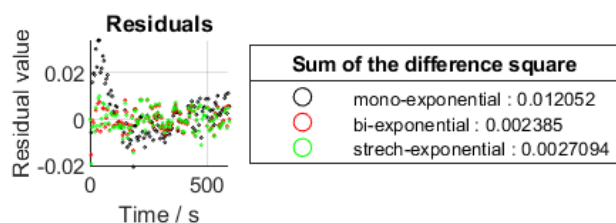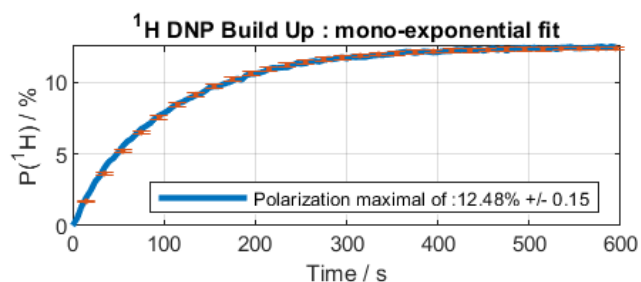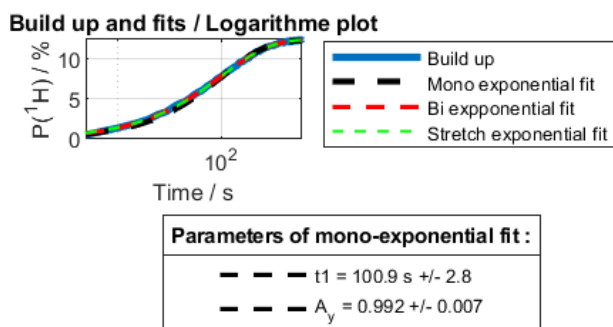

## Part 2

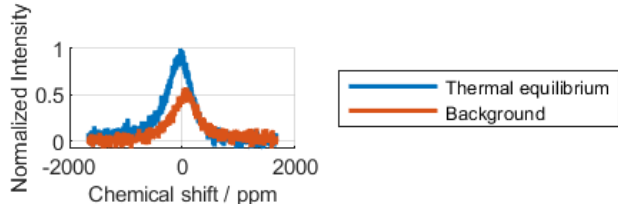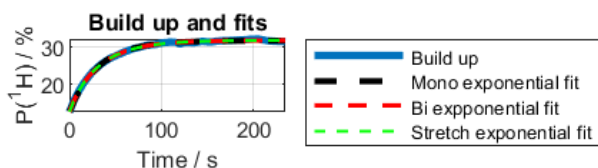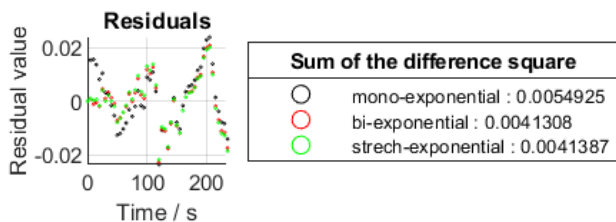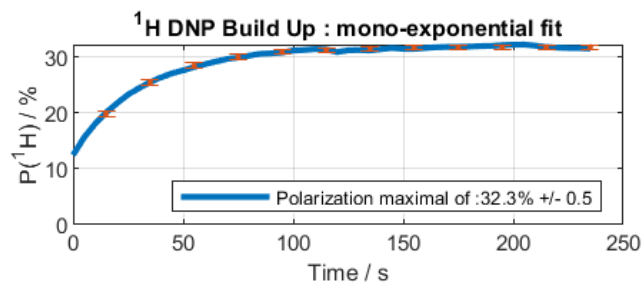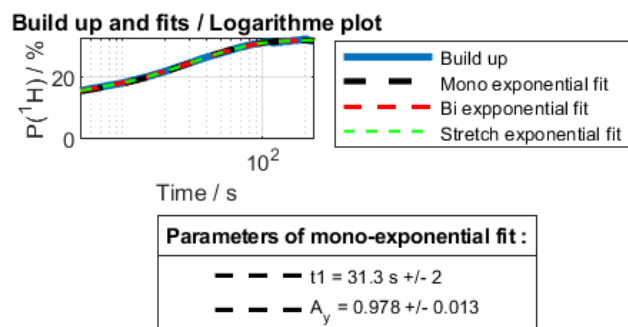

TED 66 / 192  $\mu\text{mol. g}^{-1}$ : Data have been acquired in two time, the first one with the wrong microwave frequency and modulation, the second one with conventional parameters.

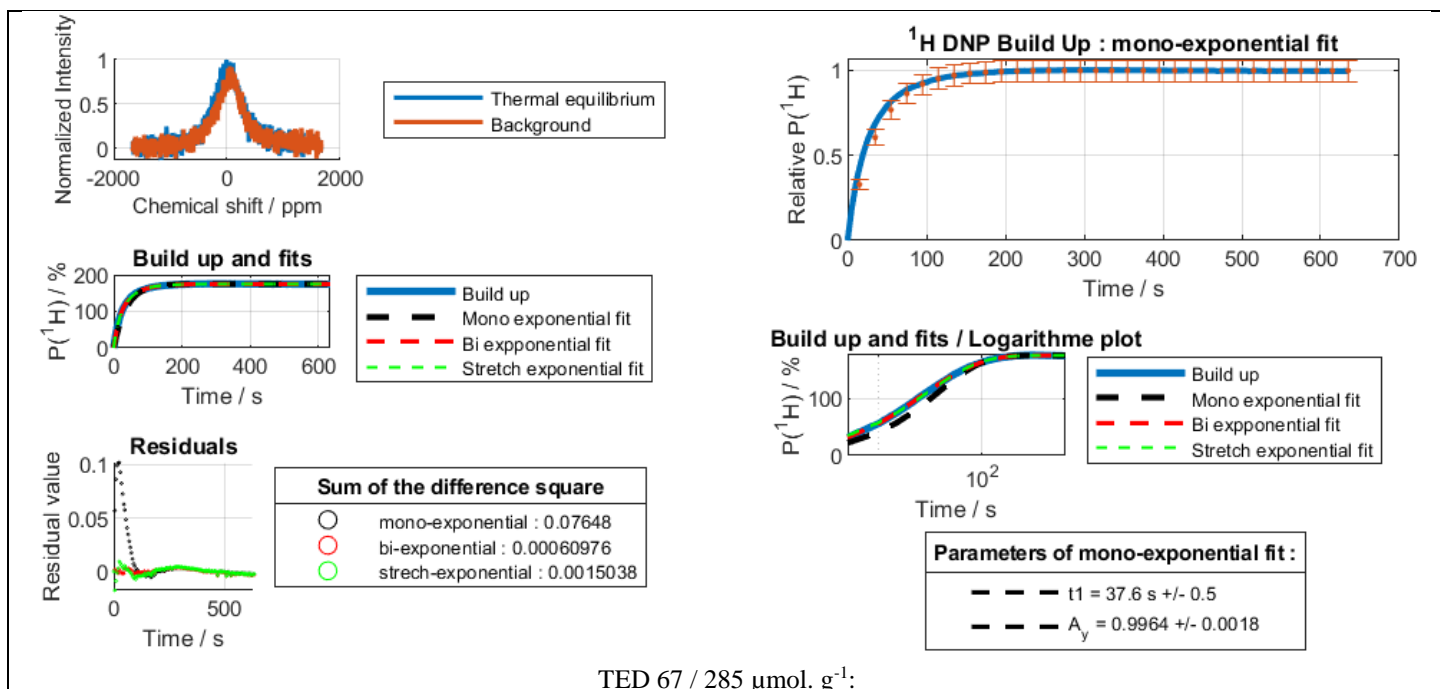

### 8.3 Impregnated (10%<sub>v</sub> H<sub>2</sub>O / 10%<sub>v</sub> ETOD<sub>6</sub> / 80%<sub>v</sub> H<sub>2</sub>O) HYPOP <sup>1</sup>H DNP build-ups

▪ Due to a technical mistake, impregnated HYPOP at 285  $\mu\text{mol.g}^{-1}$  has been polarized without the same microwaves modulation and so its RDNP is not consistent with others (Fig 3a in main text).

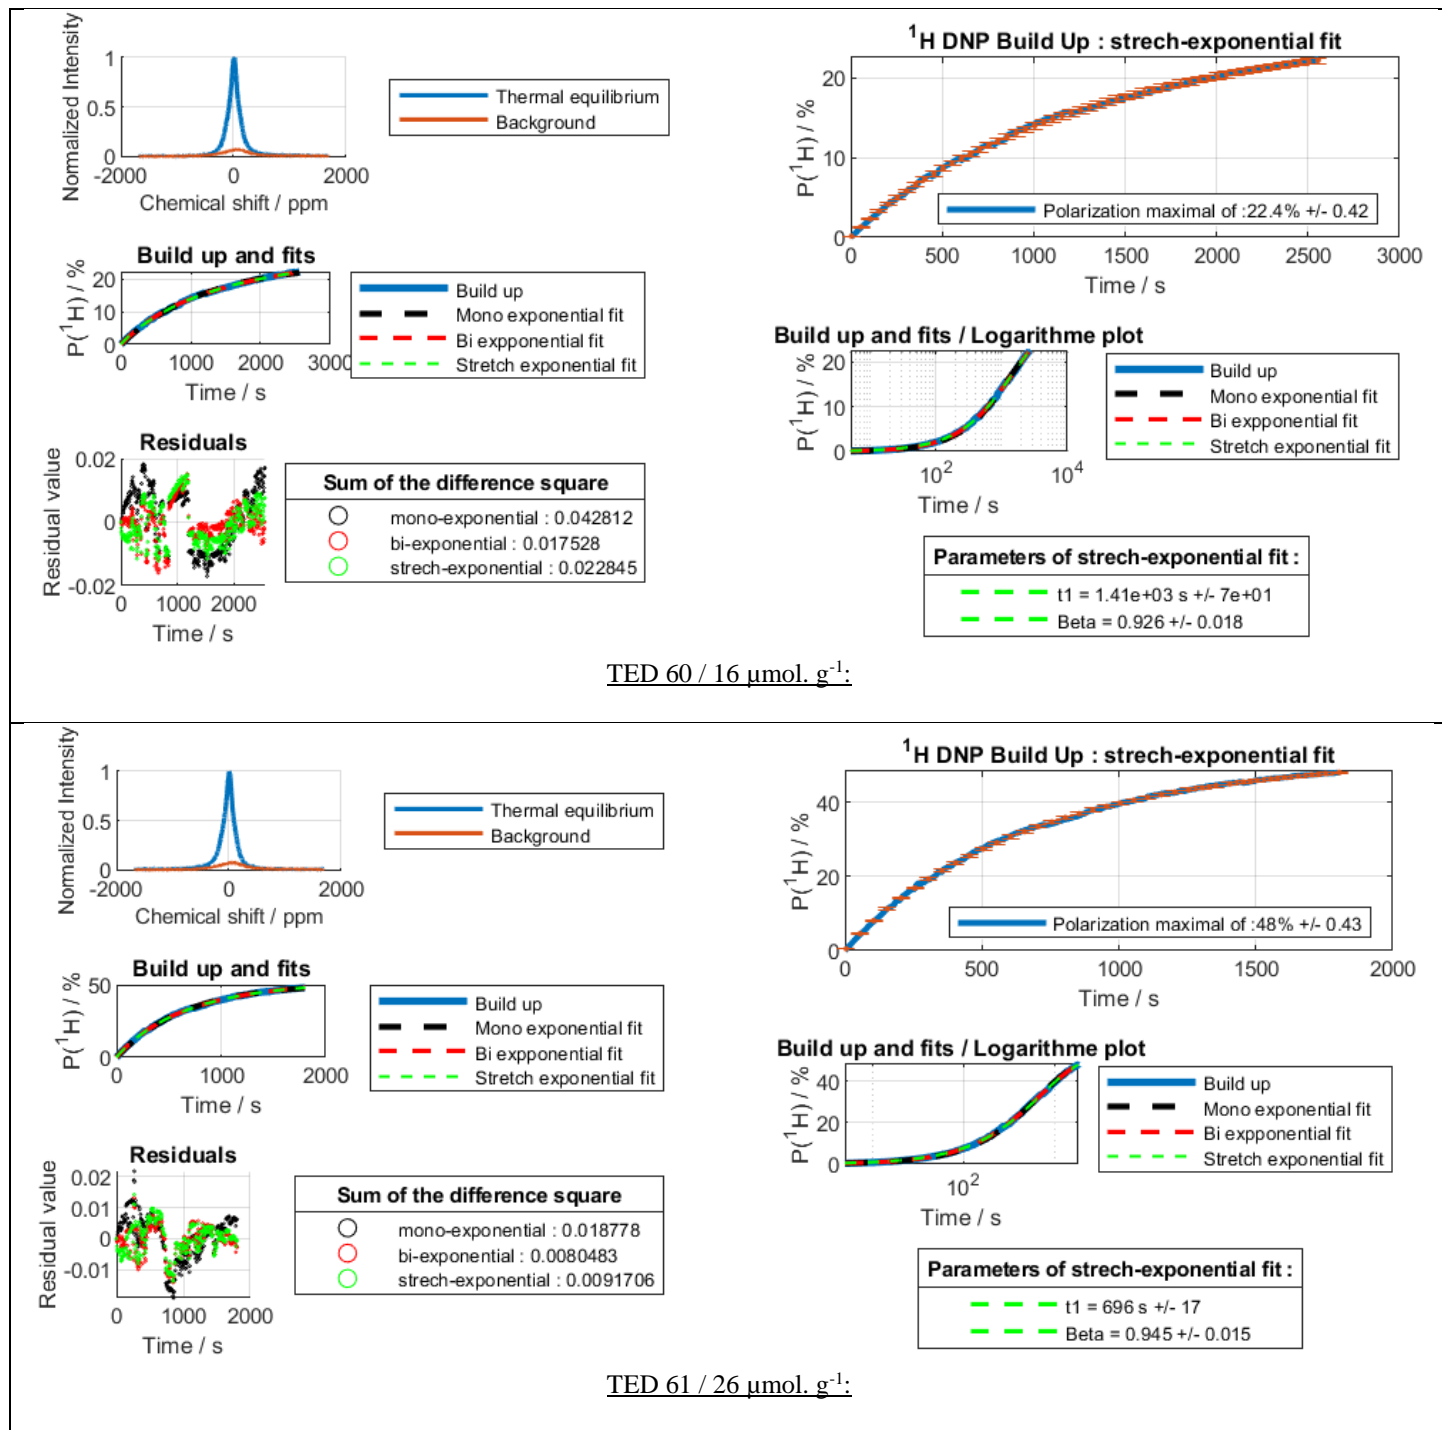



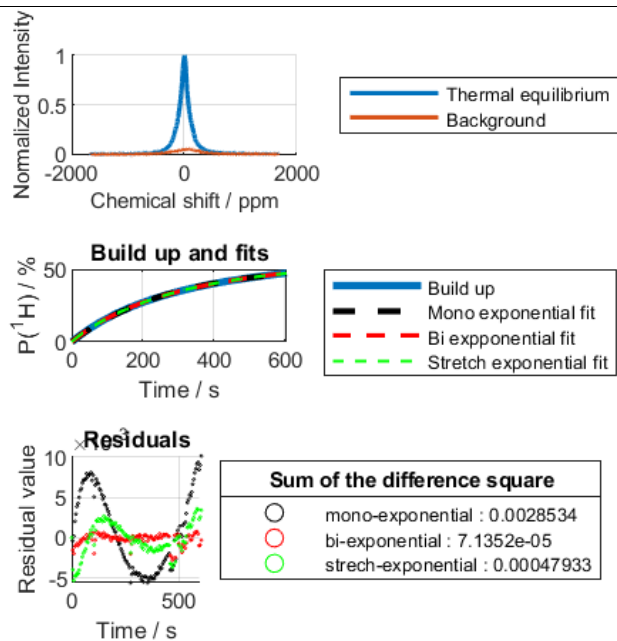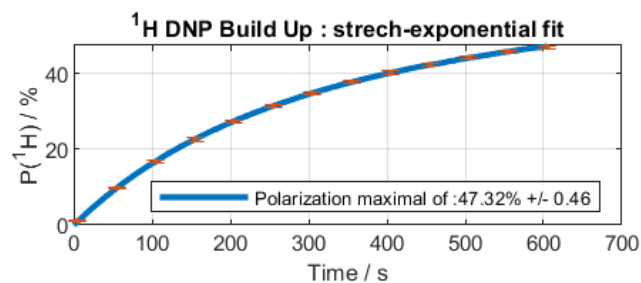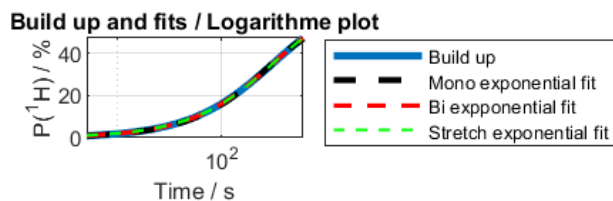

**Parameters of stretch-exponential fit :**

|     |                             |
|-----|-----------------------------|
| --- | $t_1 = 305 \text{ s} \pm 7$ |
| --- | Beta = 0.949 +/- 0.011      |

TED 62 / 45  $\mu\text{mol. g}^{-1}$

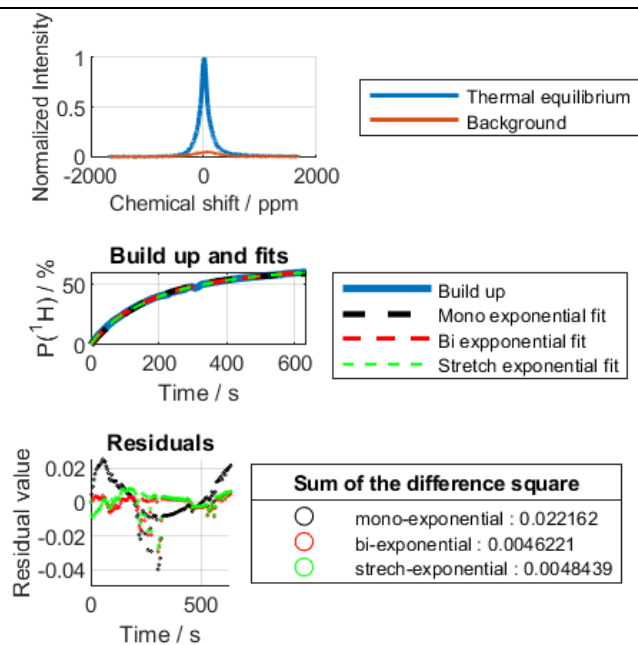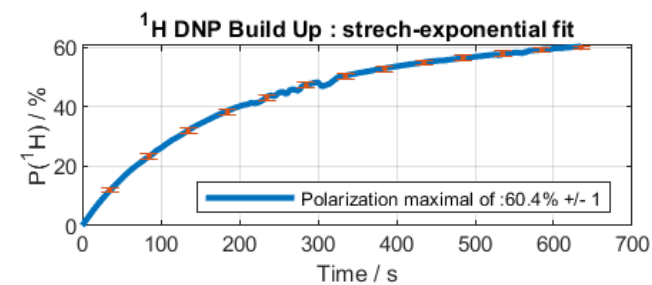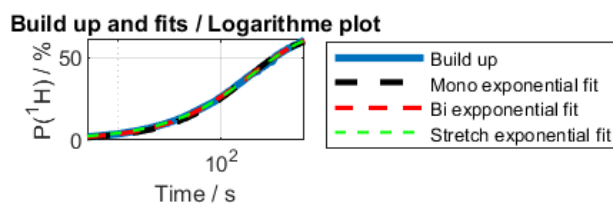

**Parameters of stretch-exponential fit :**

|     |                                         |
|-----|-----------------------------------------|
| --- | $t_1 = 209 \text{ s} \pm 1 \times 10^1$ |
| --- | Beta = 0.882 +/- 0.029                  |

TED 63 / 62  $\mu\text{mol. g}^{-1}$

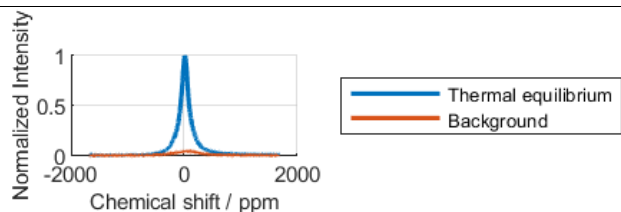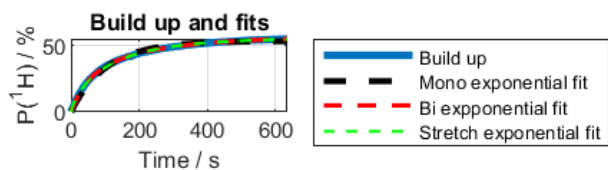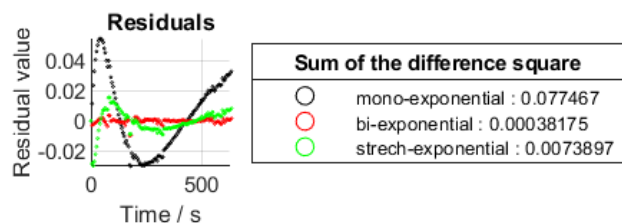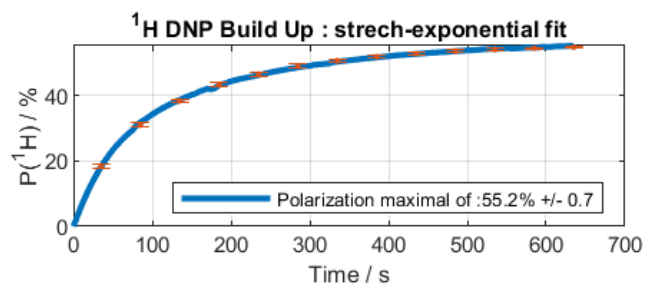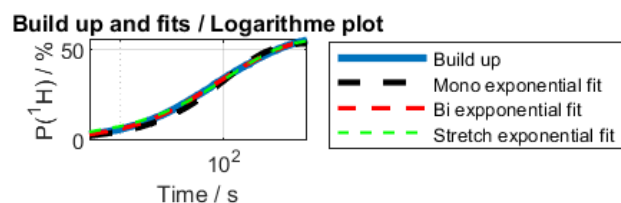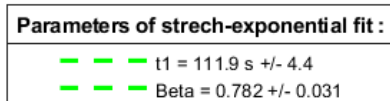

TED 64 / 93  $\mu\text{mol. g}^{-1}$

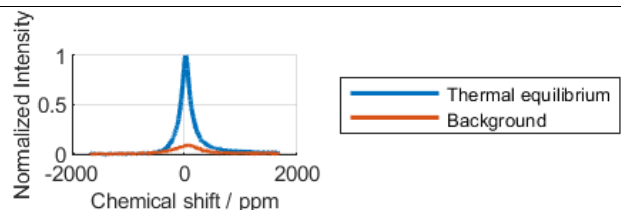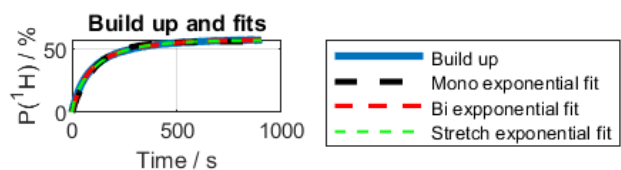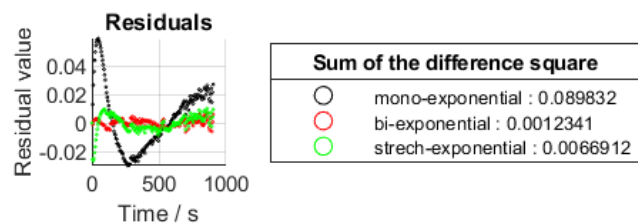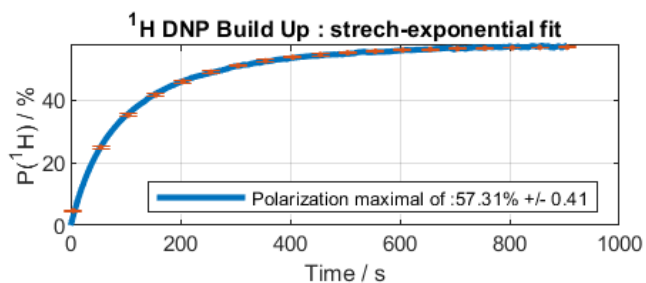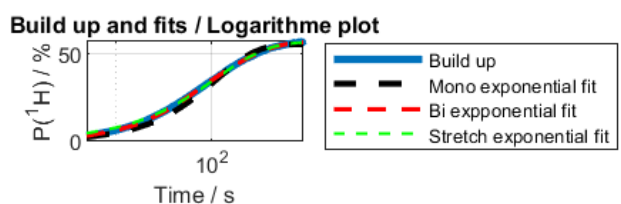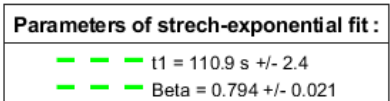

TED 65 / 116  $\mu\text{mol. g}^{-1}$

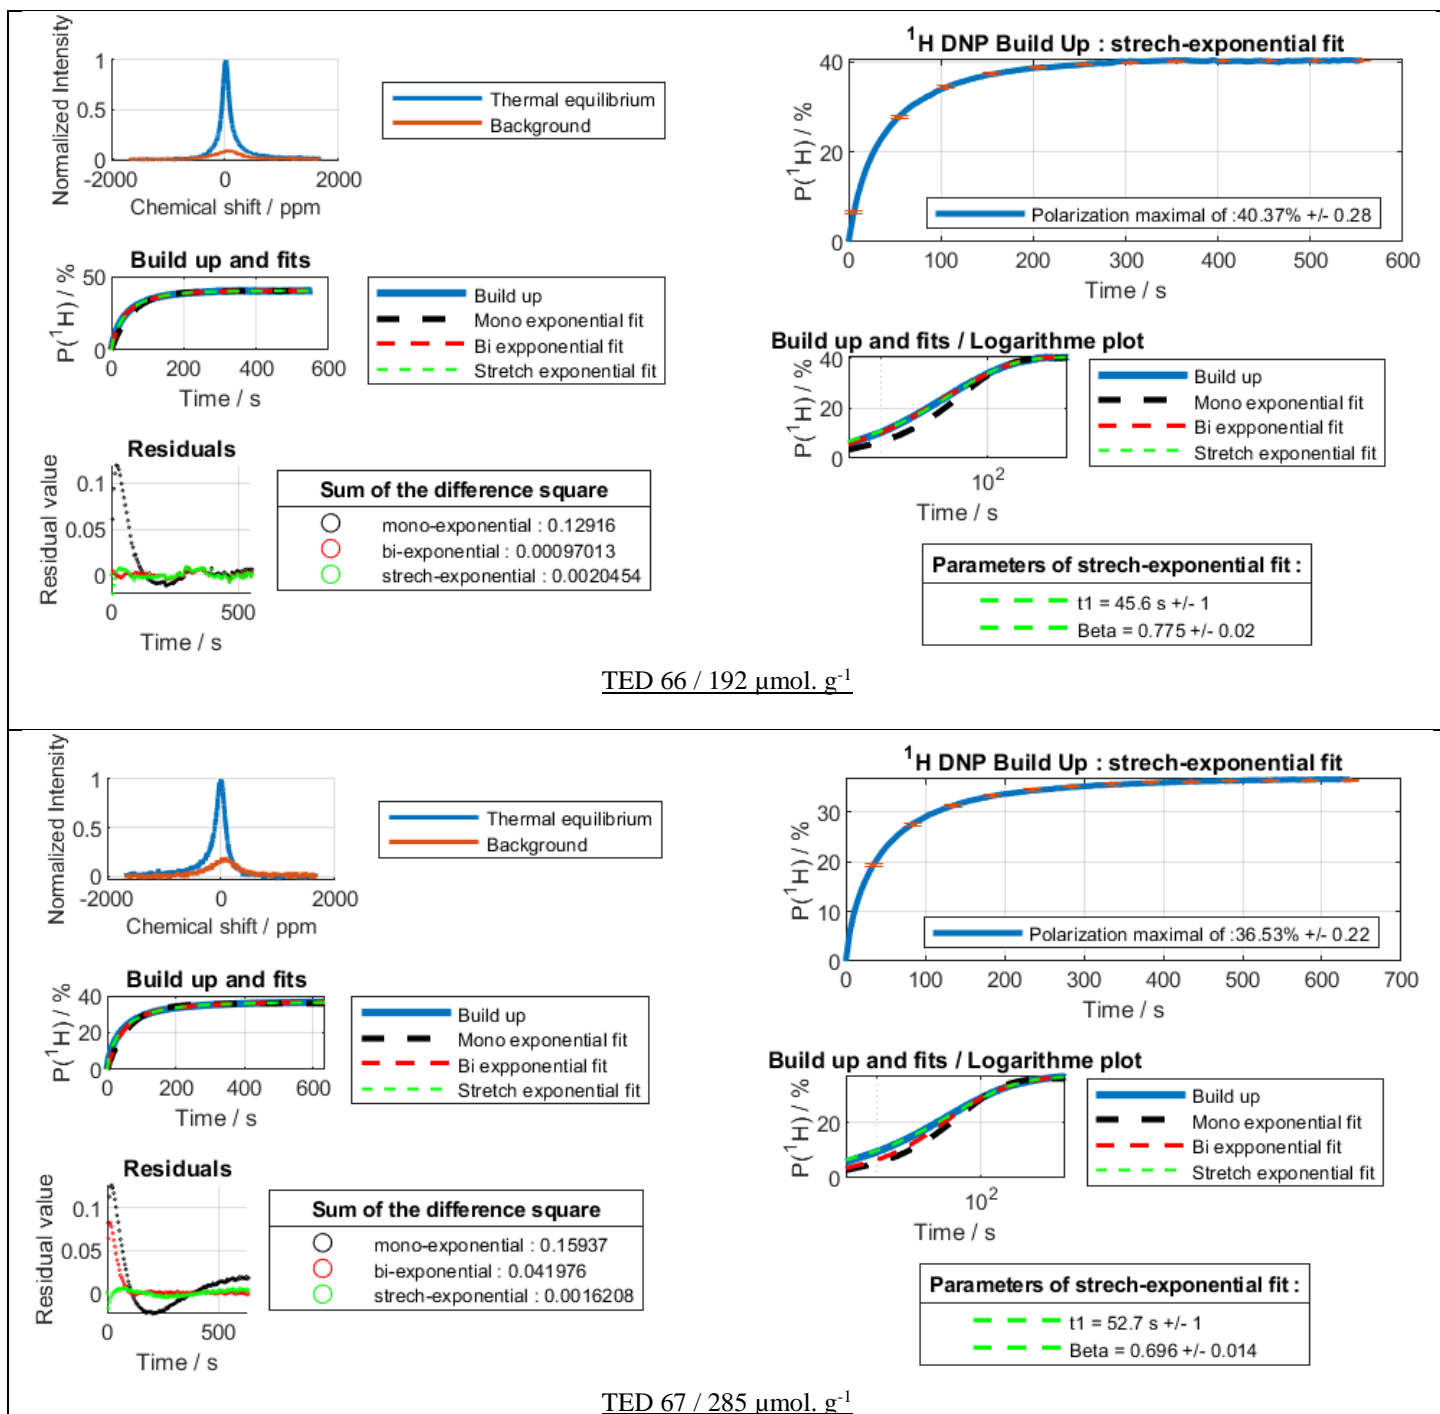

Figure S10:  $^1\text{H DNP}$  builds up.

## 8.4 $^{13}\text{C}$ relaxation measurement

The pulse angle of the solid state  $^{13}\text{C}$  pulse is measured by monitoring the signal loss under the effect of a large train of pulses. The procedure consists first in hyperpolarizing the  $^{13}\text{C}$  spins by CP-DNP so as to obtain a high SNR. Then the signal is acquired by trains of 64 scans, with minimal delay between the acquisitions. Each block of 64 transients is summed and saved in a pseudo 2D experiment. Taking into account the time that the spectrometer needs to store the data, 128 acquisitions are performed in 34 s. For a pulse angle expected in the order of  $\sim 5^\circ$ , a train of 64 pulses diminished the magnetization from 1 to  $(\cos 5^\circ)^{64} \approx 0.78$ . After the 128<sup>th</sup> acquisition, the remaining magnetization is  $(\cos 5^\circ)^{64 \times 128} \approx 0$ .

It can be shown that the signal intensity along the experiment is given by:

$$S_k/S_0 = \left( \cos \alpha e^{-\tau/T_1} \right)^{kN} \approx (\cos \alpha)^{kN}$$

where  $S_0$  and  $S_k$  are the signal intensities of the first and the  $k^{\text{th}}$  spectra, assuming  $k \in \llbracket 0, N - 1 \rrbracket$  with  $N$  being the number of spectra and where  $\tau$ ,  $T_1$  and  $\alpha$  are the time between acquisition blocks, the longitudinal relaxation time constant and the pulse angle. As the longitudinal relaxation time constant  $T_1$  is in the order of hours, the whole loss of magnetization during this procedure is attributed to the effect of the pulses, which allows the simplification of the equation above. This simple equation is fitted to the decay induced by the effect of the pulses with  $\alpha$  as free parameter, leading to a precise measurement of the pulse angle.

This allows to compare signal integrals between spectra that were recorded with different number of scans. It can be shown that the signal intensity of two spectra recorded with different number of scans (assuming that each scan destroys a portion  $1 - \cos \alpha$  of the magnetization and that no other mechanisms affect the magnetization) is given by:

$$\frac{S_1}{S_2} = \frac{\cos \alpha^{N_1} - 1}{\cos \alpha^{N_2} - 1}$$

where  $N_1$  and  $N_2$  are the number of scans leading to signal intensities  $S_1$  and  $S_2$ , respectively. For example, in the case of a pulse angle of  $4.3^\circ$ , the ratio between signals acquired 64 and 1 scans is not 64 but:

$$\frac{S_1}{S_2} = \frac{\cos^{64} 4.3^\circ - 1}{\cos^1 4.3^\circ - 1} \approx 58.6$$

The relaxation  $T_1$  of the carbon measured at 3.8 K and 7.02 T has been determined using a Matlab fitting script and the following formula:

$$P(t) = P_0 \times e^{\left(\frac{-t}{T_1}\right)} \times (\cos \alpha)^{\left(\frac{NS \times t}{D1}\right)},$$

with:

- $t$  Time (hours).
- $P(t)$  Polarization at time  $t$ . and at the beginning of the experiment.
- $P_0$  Polarization at time  $t=0$ .
- $T_1$   $^{13}\text{C}$  Relaxation typical time (hours).
- $\alpha$  Pulse angle ( $4^\circ$ ).
- $NS$  Number of scans.
- $D1$  Delay between acquisitions (30 minutes).

## 8.5 Calculation of enhancements after dissolution

Enhancements/polarizations values were calculated in three steps, and first by calculating analyte concentrations in the tube, using the following formula:

$$C_H = C_{Ref} \times \frac{I_H \times NS_{Ref} \times RG_{Ref}}{I_{Ref} \times NS_H \times RG_H},$$

with:

- *H* Proton experiment performed on dissolved solution after let the solution reach the Boltzman equilibrium. In this experiment we observed the formate signal.
- *Ref* Proton experiment performed on a reference containing 1 M of formate in a fully deuterated solvent.
- *C* Concentration of formate in moles.
- *I* Absolute values of formate signal integrals.
- *NS* Number of scans.
- *RG* Receiver gain (dB) of each experiments.

Concentration of formate in tube after dissolution have been calculated to be 5 mM and due to the huge signal of water overlapping the signal of the acetate, we assumed to consider concentrations of formate and acetate as equal.

<sup>13</sup>C enhancements were then calculated the following way:

$$\varepsilon = \frac{I_{Hyp} \times C_{Ref} \times NS_{Ref} \times RG_{Ref}}{I_{ref} \times C_{Hyp} \times NS_H \times RG_H},$$

with:

- *Hyp* <sup>13</sup>C signal obtained just after dissolution on formate and acetate.
- *Ref* <sup>13</sup>C reference signal obtained on a reference containing 1 M of formate in a fully deuterated solvent.
- *C* Concentrations in moles.
- *I* Absolute values of formate/acetate signal integrals.
- *NS* Number of scans.
- *RG* Receiver gain (dB) of each experiments.

## 9 Bibliography

1. Eaton GR, Eaton SS, Barr DP, Weber RT. *Quantitative EPR*. SpringerWi. Springer New York; 2010.
2. Huang H. Uncertainty estimation with a small number of measurements, part I: New insights on the t-interval method and its limitations. *Meas Sci Technol*. 2018;29(1).
3. Bornet A, Melzi R, Perez Linde AJ, et al. Boosting dissolution dynamic nuclear polarization by cross polarization. *J Phys Chem Lett*. 2013;4(1):111-114.
